# Supplementary material
Source: MDPI journal article supplement (https://www.mdpi.com/2304-6740/11/3/116)
Supplement: s1 [file s1]

PAGES OF SUPPORTING INFORMATION FOR THE  
PAPER:

Synthesis and Characterization of Pt(II) and Pd(II)  
Complexes With Planar Aromatic Oximes.

Mikala Meadows, Lei Yang, Cody Turner, Mikhail Berezin, Sergiy Tyukhtenko  
and Nikolay Gerasimchuk\*

Actual photographs of powdery samples of Pt(II) naphthoquinone-oximes under x40 magnification.

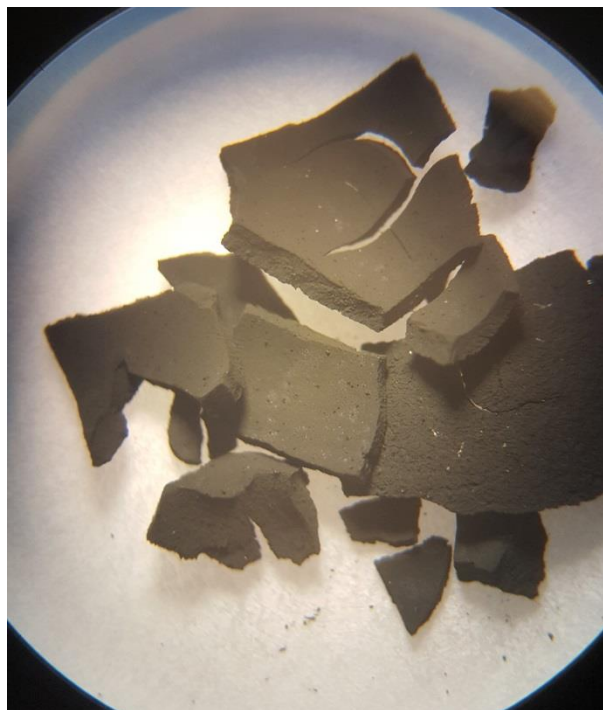

$\text{PtL}_2^1 = \text{Pt}(\text{1NO-2O})_2$

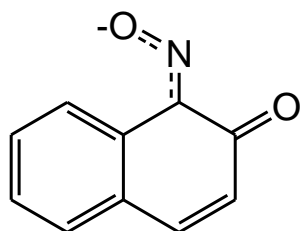

$\text{1NO-2O} = \text{L}^1$

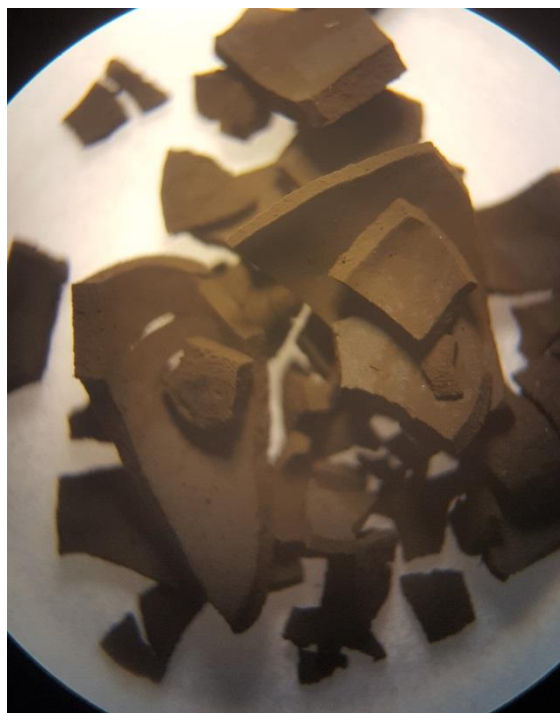

$\text{PtL}_2^2 = \text{Pt}(\text{2NO-1O})_2$

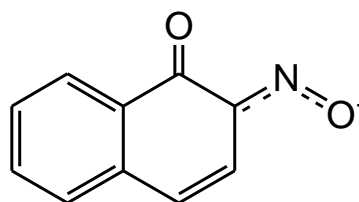

$\text{2NOH-1O} = \text{L}^2$

Actual photographs of powdery samples of Pd(II) naphthoquinone-oximes under x40 magnification.

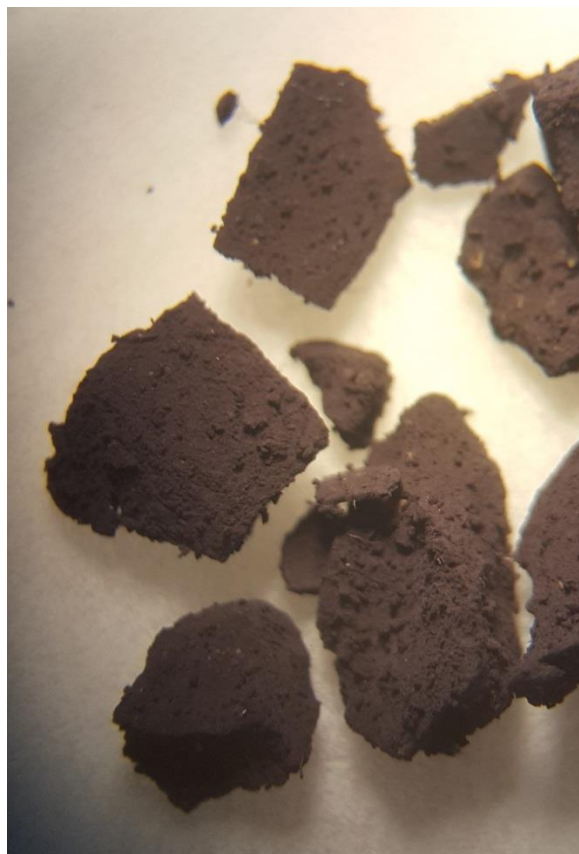

$\text{PdL}_2^1 = \text{Pd}(\text{1NO-2O})_2$

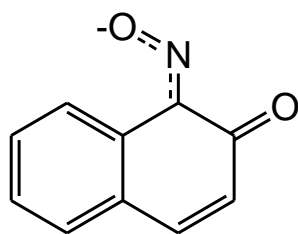

$\text{1NO-2O} = \text{L}^1$

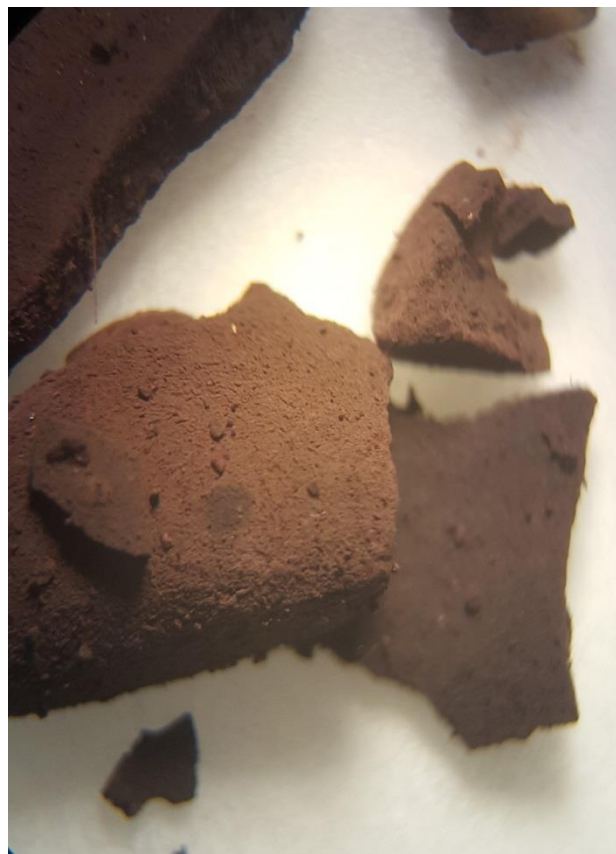

$\text{PdL}_2^2 = \text{Pd}(\text{2NO-1O})_2$

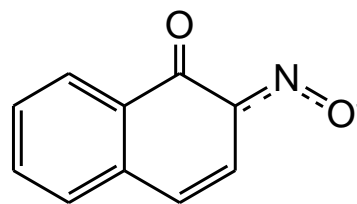

$\text{2NOH-1O} = \text{L}^2$

# Supplementary Information

S 3

Analytical data for Pt complexes with ligands shown in yellow boxes.

| <b>ATLANTIC MICROLAB, INC.</b>                                         |  |                                                   |  |
|------------------------------------------------------------------------|--|---------------------------------------------------|--|
| Sample No. <u>Pt(II) 1NO-2OH</u>                                       |  | <b>SUBMITTER</b>                                  |  |
| 6180 Atlantic Blvd. Suite M<br>Norcross, GA 30071                      |  | Company / School <u>Missouri State University</u> |  |
| <a href="http://www.atlanticmicrolab.com">www.atlanticmicrolab.com</a> |  | Address <u>901 South National Avenue</u>          |  |
| PROFESSOR/SUPERVISOR: <u>Dr. N. Gerasimchuk</u>                        |  | Dept. <u>Chemistry</u>                            |  |
| PO# / CC#:                                                             |  | NAME <u>Mikala Meadows</u> DATE <u>11/9/21</u>    |  |
|                                                                        |  | PHONE                                             |  |

  

| Element                                                                        | Theory  | Found |  | Single <input checked="" type="checkbox"/>                                                                                                                                                                                                                                                                                                                                                                                                                                                                           | Duplicate <input type="checkbox"/> |
|--------------------------------------------------------------------------------|---------|-------|--|----------------------------------------------------------------------------------------------------------------------------------------------------------------------------------------------------------------------------------------------------------------------------------------------------------------------------------------------------------------------------------------------------------------------------------------------------------------------------------------------------------------------|------------------------------------|
| C                                                                              | 44.5300 | 44.35 |  | Elements Present: <u>C, H, N, O, Pt</u><br>Analyze for: <u>C, H, N</u><br>Hygroscopic <input checked="" type="checkbox"/> Explosive <input type="checkbox"/><br>M.P. _____ B.P. _____<br>To be dried: Yes <input type="checkbox"/> No <input type="checkbox"/><br>Temp. _____ Vac. _____ Time _____<br>RUSH SERVICE <input type="checkbox"/> Rush service guarantees analysis will be completed and results available by 11am EST on the day the sample is received by 11am.<br>Include Email Address or Fax # Below |                                    |
| H                                                                              | 2.2400  | 2.18  |  |                                                                                                                                                                                                                                                                                                                                                                                                                                                                                                                      |                                    |
| N                                                                              | 5.1900  | 5.18  |  |                                                                                                                                                                                                                                                                                                                                                                                                                                                                                                                      |                                    |
| Date Received <u>NOV 09 2021</u> Date Completed <u>NOV 10 2021</u><br>Remarks: |         |       |  |                                                                                                                                                                                                                                                                                                                                                                                                                                                                                                                      |                                    |

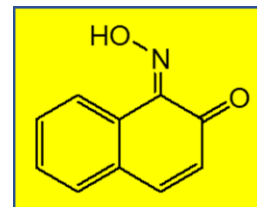

| <b>ATLANTIC MICROLAB, INC.</b>                                         |  |                                                   |  |
|------------------------------------------------------------------------|--|---------------------------------------------------|--|
| Sample No. <u>Pt(II) 2NO-1OH</u>                                       |  | <b>SUBMITTER</b>                                  |  |
| 6180 Atlantic Blvd. Suite M<br>Norcross, GA 30071                      |  | Company / School <u>Missouri State University</u> |  |
| <a href="http://www.atlanticmicrolab.com">www.atlanticmicrolab.com</a> |  | Address <u>901 South National Avenue</u>          |  |
| PROFESSOR/SUPERVISOR: <u>Dr. N. Gerasimchuk</u>                        |  | Dept. <u>Chemistry</u>                            |  |
| PO# / CC#:                                                             |  | NAME <u>Mikala Meadows</u> DATE <u>11/9/21</u>    |  |
|                                                                        |  | PHONE                                             |  |

  

| Element                                                                        | Theory  | Found |       | Single <input checked="" type="checkbox"/>                                                                                                                                                                                                                                                                                                                                                                                                                                                                           | Duplicate <input type="checkbox"/> |
|--------------------------------------------------------------------------------|---------|-------|-------|----------------------------------------------------------------------------------------------------------------------------------------------------------------------------------------------------------------------------------------------------------------------------------------------------------------------------------------------------------------------------------------------------------------------------------------------------------------------------------------------------------------------|------------------------------------|
| C                                                                              | 44.5300 | 44.89 | 45.02 | Elements Present: <u>C, H, N, O, Pt</u><br>Analyze for: <u>C, H, N</u><br>Hygroscopic <input checked="" type="checkbox"/> Explosive <input type="checkbox"/><br>M.P. _____ B.P. _____<br>To be dried: Yes <input type="checkbox"/> No <input type="checkbox"/><br>Temp. _____ Vac. _____ Time _____<br>RUSH SERVICE <input type="checkbox"/> Rush service guarantees analysis will be completed and results available by 11am EST on the day the sample is received by 11am.<br>Include Email Address or Fax # Below |                                    |
| H                                                                              | 2.2400  | 2.31  | 2.26  |                                                                                                                                                                                                                                                                                                                                                                                                                                                                                                                      |                                    |
| N                                                                              | 5.1900  | 4.78  | 4.81  |                                                                                                                                                                                                                                                                                                                                                                                                                                                                                                                      |                                    |
| NO CHARGE FOR DUPLICATES                                                       |         |       |       |                                                                                                                                                                                                                                                                                                                                                                                                                                                                                                                      |                                    |
| Date Received <u>NOV 09 2021</u> Date Completed <u>NOV 10 2021</u><br>Remarks: |         |       |       |                                                                                                                                                                                                                                                                                                                                                                                                                                                                                                                      |                                    |

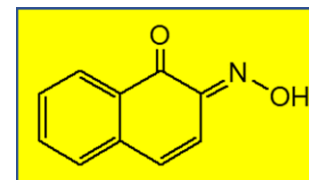

**S 4**

O=C1C=CC2=CC=CC=C2C(=O)N1O

The H-content is off by 0.77%, and the reason for such discrepancy is not clear.

## Supplementary Information

S 5

Example of analytical data for Pd complex with ligand shown in yellow box.

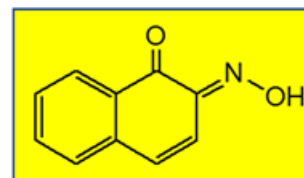

| <b>ATLANTIC MICROLAB, INC.</b>                                                                                                                                              |         |                                                   |       |
|-----------------------------------------------------------------------------------------------------------------------------------------------------------------------------|---------|---------------------------------------------------|-------|
| Sample No. <u>Pd(II) 2NO-1OH</u>                                                                                                                                            |         | <b>SUBMITTER</b>                                  |       |
| 6180 Atlantic Blvd. Suite M<br>Norcross, GA 30071                                                                                                                           |         | Company / School <u>Missouri State University</u> |       |
| <a href="http://www.atlantiemicrolab.com">www.atlantiemicrolab.com</a>                                                                                                      |         | Address <u>901 South National Avenue</u>          |       |
| PROFESSOR/SUPERVISOR: <u>Dr. N. Gerasimchuk</u>                                                                                                                             |         | Dept. <u>Chemistry</u>                            |       |
| PO# / CC#:                                                                                                                                                                  |         | NAME <u>Mikala Meadows</u> DATE <u>11/9/21</u>    |       |
|                                                                                                                                                                             |         | PHONE _____                                       |       |
| Element                                                                                                                                                                     | Theory  | Found                                             |       |
| C                                                                                                                                                                           | 53.2900 | 49.88                                             | 49.74 |
| H                                                                                                                                                                           | 2.6800  | 2.46                                              | 2.50  |
| N                                                                                                                                                                           | 6.2100  | 5.17                                              | 5.17  |
| NO CHARGE FOR DUPLICATES                                                                                                                                                    |         |                                                   |       |
| <div style="display: flex; justify-content: space-between;"> <span>Single <input checked="" type="checkbox"/></span> <span>Duplicate <input type="checkbox"/></span> </div> |         |                                                   |       |
| Elements Present: <u>C, H, N, O, Pd</u>                                                                                                                                     |         |                                                   |       |
| Analyze for: <u>C, H, N</u>                                                                                                                                                 |         |                                                   |       |
| Hygroscopic <input checked="" type="checkbox"/> Explosive <input type="checkbox"/>                                                                                          |         |                                                   |       |
| M.P. _____ B.P. _____                                                                                                                                                       |         |                                                   |       |
| To be dried: Yes <input type="checkbox"/> No <input type="checkbox"/>                                                                                                       |         |                                                   |       |
| Temp. _____ Vac. _____ Time _____                                                                                                                                           |         |                                                   |       |
| RUSH SERVICE <input type="checkbox"/> Rush service guarantees analyses will be completed and results available by 11am EST on the day the sample is received by 11am.       |         |                                                   |       |
| Include Email Address or Fax # Below                                                                                                                                        |         |                                                   |       |
| Date Received <u>NOV 09 2021</u>                                                                                                                                            |         | Date Completed <u>NOV 10 2021</u>                 |       |
| Remarks:                                                                                                                                                                    |         |                                                   |       |

Herein average: C = 49.81%, H = 2.48%, N = 5.17%.

The best fit is for  $\text{PdL}^{1}_2 \cdot 2\text{H}_2\text{O}$  calculated:

C = 49.35%, H = 3.31%, N = 5.75%.



Photograph of actual crystals of  $\text{PtL}_2$  (as nitrobenzene solvate) grown in capillary during vapor diffusion by ether.

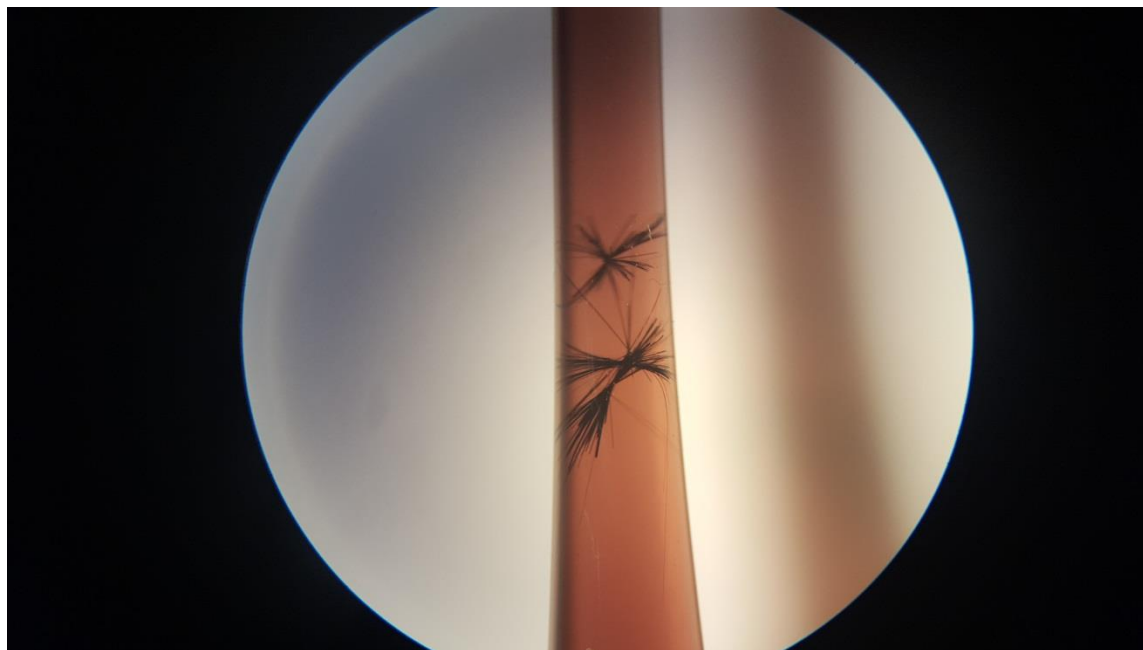

Videomicroscope face-indexing of a thin needle of  $\text{PtL}_2$ . Images were used for the crystal size determination.

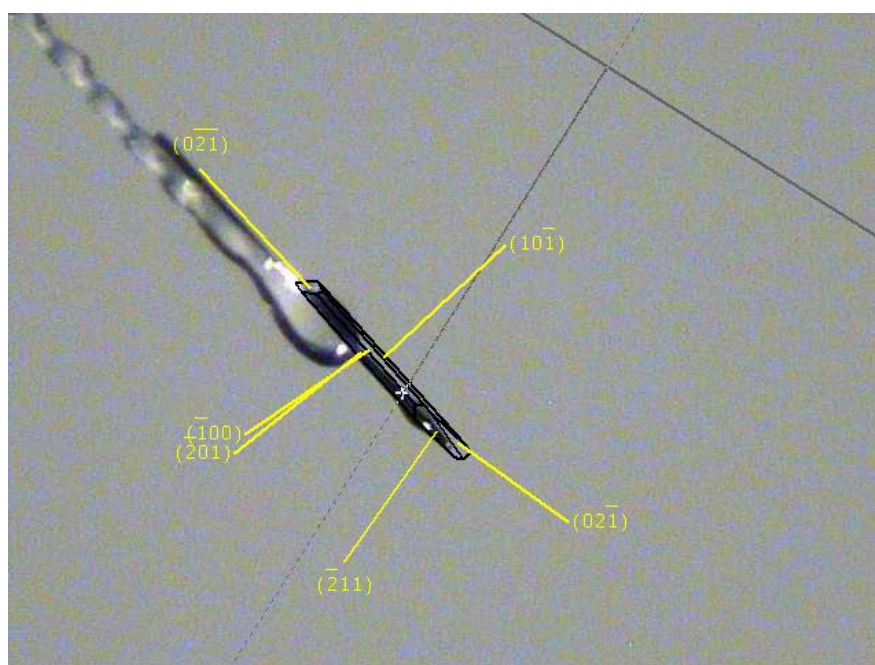

---

Twin Laws (transformation matrices for the first 4 domains) for crystal sample of **PtL<sub>2</sub>**, **acetonitrile solvate**.

**Transforms h1.1(1)->h1.2(2)**

|          |         |          |
|----------|---------|----------|
| 1.00053  | 0.00075 | 0.00462  |
| -0.00030 | 0.99948 | -0.00313 |
| -0.01916 | 0.00437 | 0.99989  |

**Transforms h1.1(1)->h1.3(3)**

|          |          |          |
|----------|----------|----------|
| -0.63044 | -0.49340 | -0.14014 |
| -1.15077 | 0.64935  | -0.11580 |
| 0.78957  | -0.04154 | -0.90742 |

**Transforms h1.1(1)->h1.4(4)**

|          |          |         |
|----------|----------|---------|
| 0.78613  | 0.21430  | 0.30329 |
| -1.04753 | 0.53802  | 0.43076 |
| -0.24473 | -1.08173 | 0.42118 |

**Transforms h1.2(2)->h1.3(3)**

|          |          |         |
|----------|----------|---------|
| 0.79152  | 0.21251  | 0.30033 |
| -1.03844 | 0.53717  | 0.43728 |
| -0.23690 | -1.08395 | 0.41892 |

**Transforms h1.2(2)->h1.4(4)**

|          |          |          |
|----------|----------|----------|
| -0.63291 | -0.49258 | -0.13877 |
| -1.15205 | 0.65103  | -0.10846 |
| 0.77169  | -0.03816 | -0.91120 |

**Transforms h1.3(3)->h1.4(4)**

|          |          |          |
|----------|----------|----------|
| -0.85137 | -0.32718 | -0.16100 |
| -0.18899 | 0.65113  | -0.52861 |
| 1.17805  | -0.80548 | -0.54329 |



Twin Laws (transformation matrices) for crystal sample of  $\text{PtL}_2$ , *nitrobenzene solvate*.

During data processing there were 2,899 strong reflections selected from 1,454 frames with  $I > 20\sigma(I)$  from only four domains, among which 2,363 reflections were allocated to domain #1, then 1,238 reflections to domain #2, and 975 reflections to domain #3, then 360 reflections to domain #4. To determine the structure of  $\text{PtL}_2$  a total of 1,456 frames were collected and used for a successful solution. The total exposure time was 24.27 hours. The frames were integrated with the Bruker SAINT Software package using a narrow-frame algorithm. The integration of the data using a triclinic unit cell yielded a total of 3,891 reflections to a maximum  $\theta$  angle of  $25.50^\circ$  (0.83 Å resolution), of which 3,891 were independent (average redundancy 1.000, completeness = 95.9%,  $R_{\text{int}} = 7.91\%$ ,  $R_{\text{sig}} = 11.75\%$ ) and 3,011 (77.38%) were greater than  $2\sigma(F_2)$ . The final cell constants were obtained from the refinement of the XYZ-centroids of 2,257 reflections above  $20\sigma(I)$ . The ratio of minimum to maximum apparent transmission was 0.722. The calculated minimum and maximum transmission coefficients (based on crystal size) were 0.1140 and 0.8200, while experimentally determined values were 0.4973 and 0.7454 respectively.

**Transforms h1.1(1)->h1.2(2)** with  $8^\circ$  rotation with respect to #1 main domain.

|          |          |          |
|----------|----------|----------|
| 1.00420  | -0.00118 | -0.00815 |
| -0.04217 | 0.98169  | 0.11175  |
| 0.06537  | -0.14367 | 0.99762  |

**Transforms h1.1(1)->h1.3(3)** with  $4.3^\circ$  rotation with respect to #1 main domain.

|          |          |          |
|----------|----------|----------|
| 1.00012  | 0.00179  | -0.00103 |
| -0.03857 | 0.99108  | 0.07036  |
| 0.02211  | -0.08802 | 1.00254  |

**Transforms h1.1(1)->h1.4(4)** with  $93.4^\circ$  rotation with respect to #1 main domain

|          |          |          |
|----------|----------|----------|
| 0.94316  | 0.02297  | -0.29755 |
| -0.03817 | -0.78823 | -0.46256 |
| -0.36626 | 0.62745  | -0.84754 |

**Transforms h1.2(2)->h1.3(3)**

|          |         |          |
|----------|---------|----------|
| 0.99567  | 0.00399 | 0.00665  |
| 0.00645  | 1.00346 | -0.04182 |
| -0.04060 | 0.05639 | 0.99828  |

**Transforms h1.2(2)->h1.4(4)**

|          |          |          |
|----------|----------|----------|
| 0.95725  | -0.01767 | -0.28846 |
| -0.05003 | -0.85687 | -0.36810 |
| -0.28435 | 0.50585  | -0.90854 |

The ASU in the structure of **PtL<sub>2</sub>**, **acetonitrile solvate** showing several residual peaks of electron density close to heavy atom Pt. All shown 5 Q-peaks have no chemical meaning, distant at ~1 Å from and represent “ripples” of electron density most likely stemming from multidomain nature of the crystal selected for studies.

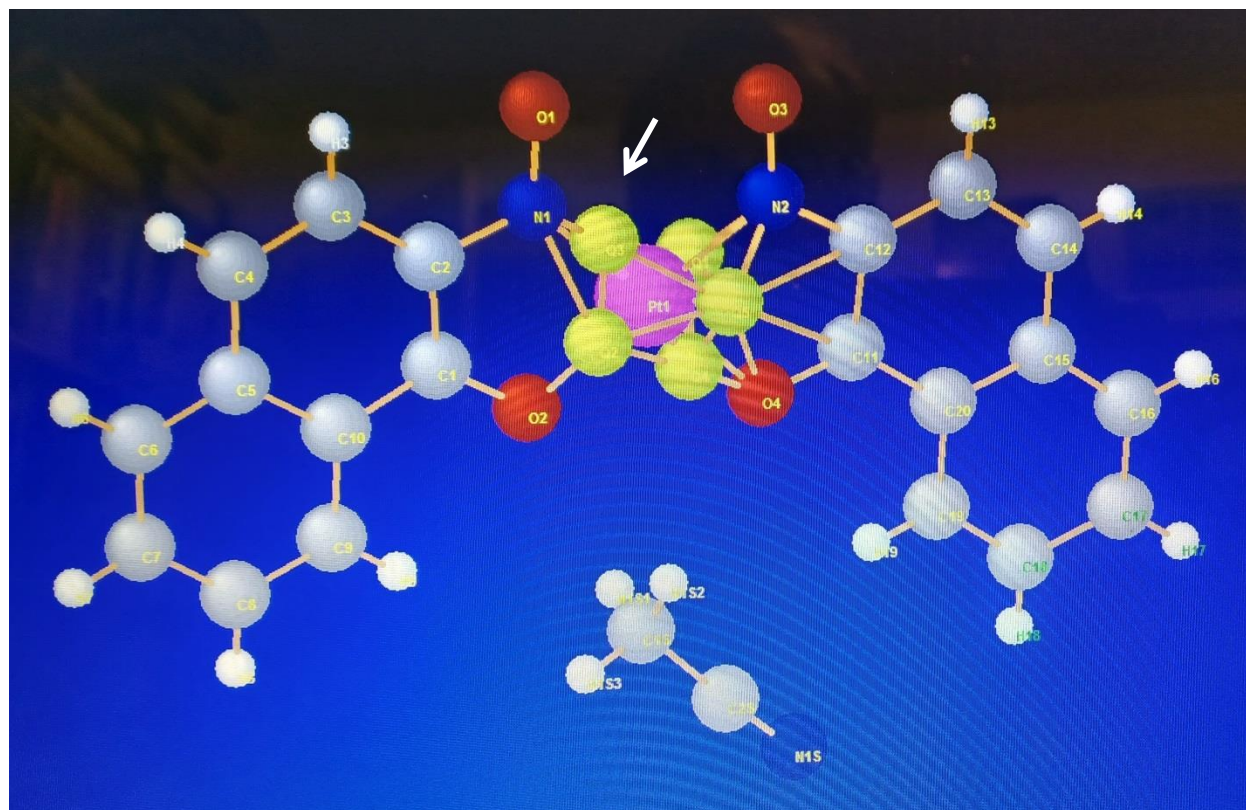

The ASU in the structure of  $\text{PtL}_2$ , **nitrobenzene solvate** showing several residual peaks of electron density close to heavy atom Pt. All shown 6 Q-peaks have no chemical meaning, and located between metal center and closest donor atoms of N and O of the organic ligand. These peaks and represent “ripples” of electron density most likely stemming from multidomain (multicomponent?) nature of the crystal selected for studies.

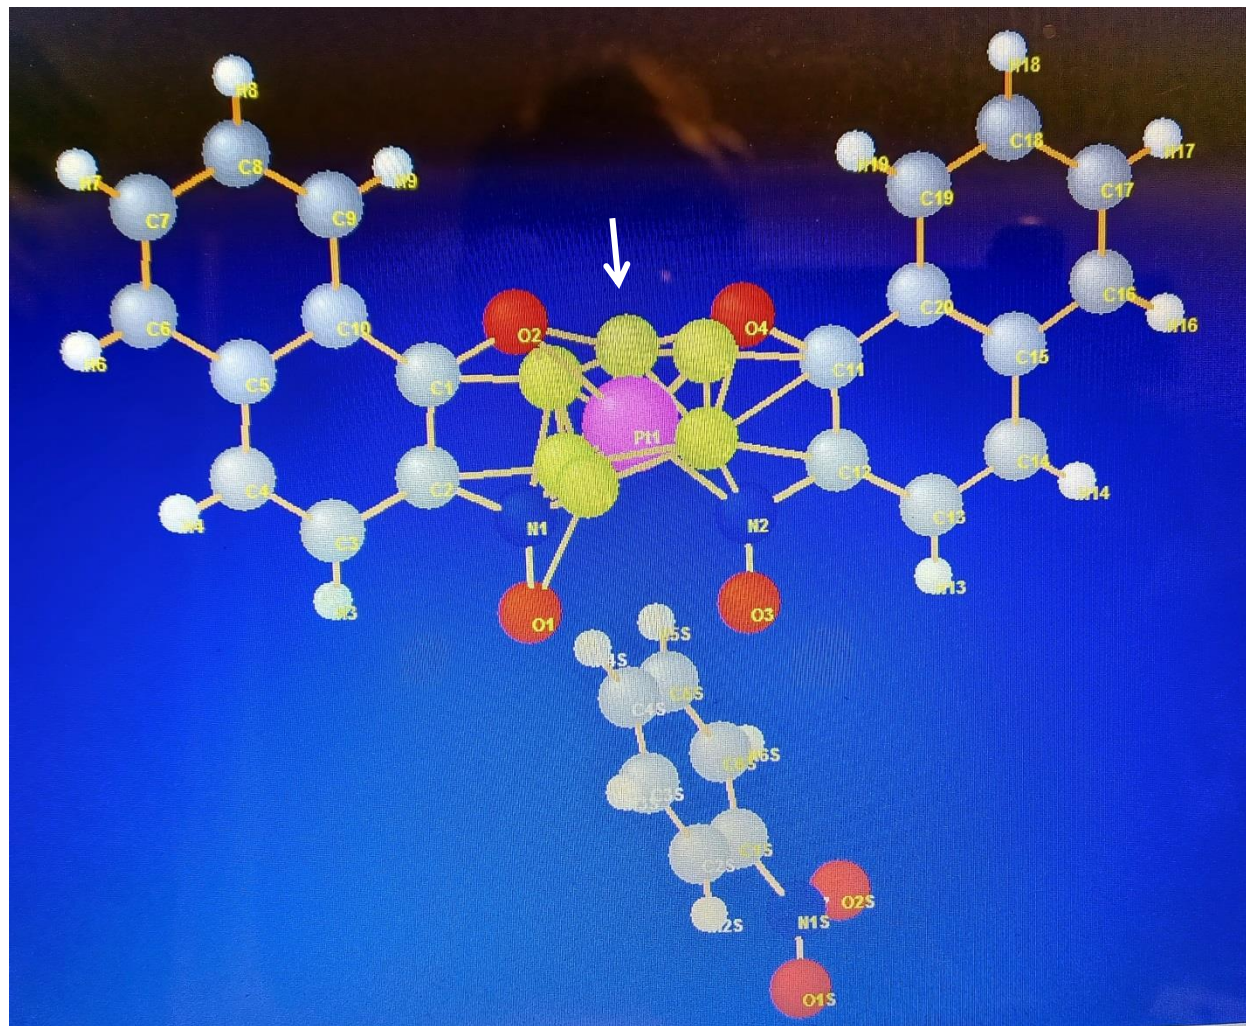

TG/DSC data for a powdery sample of pure ligand, **HL**<sup>1</sup>: **A** – panoramic view of both weight loss trace and heat flow; **B** – individual weight loss trace.

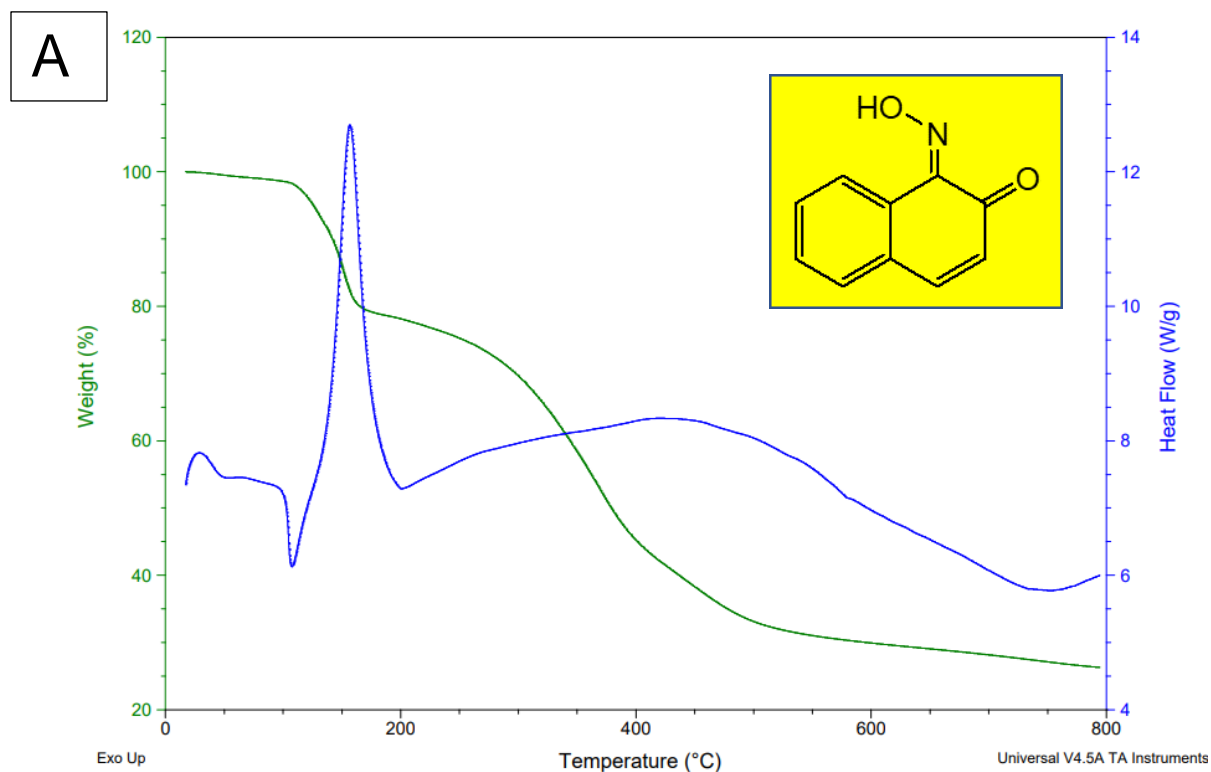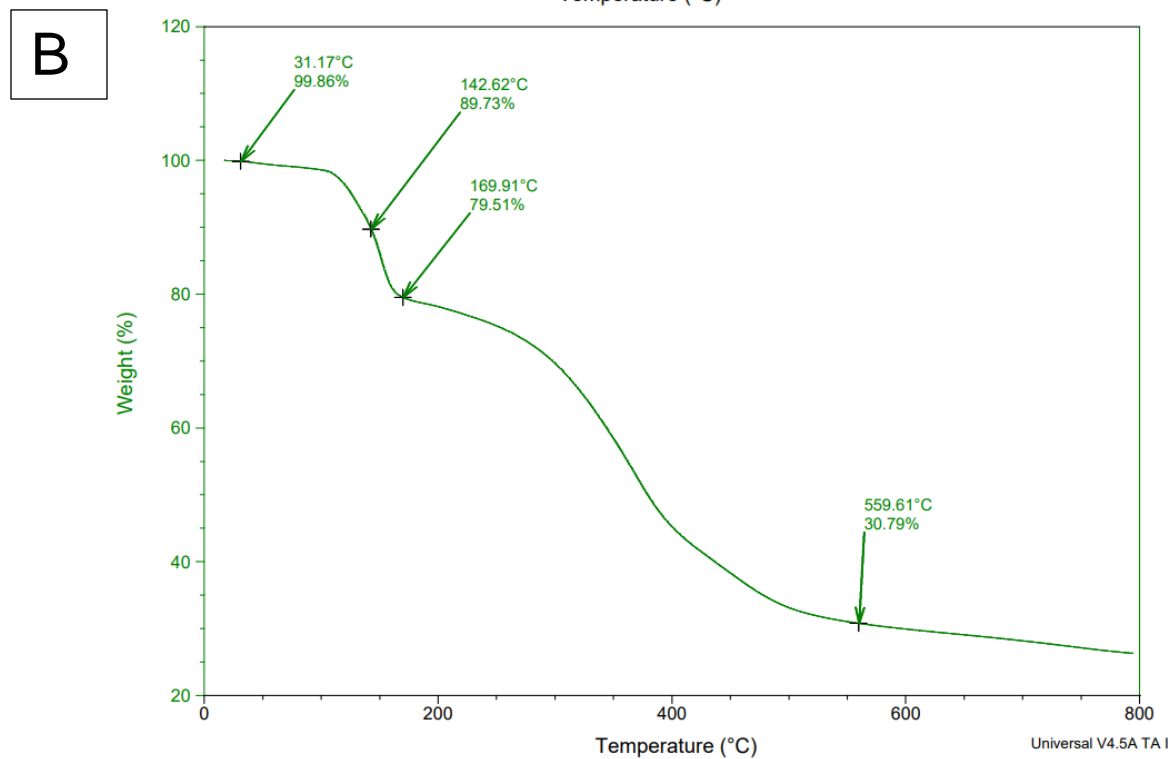

Details of the heat flow trace for **HL**<sup>1</sup> showing a strong exothermic peak in the range before 500°C (**A**), and actual photograph under microscope crucible content after TG/DSC experiment showing the formation of a glassy carbon upon heating under an inert atmosphere (**B**).

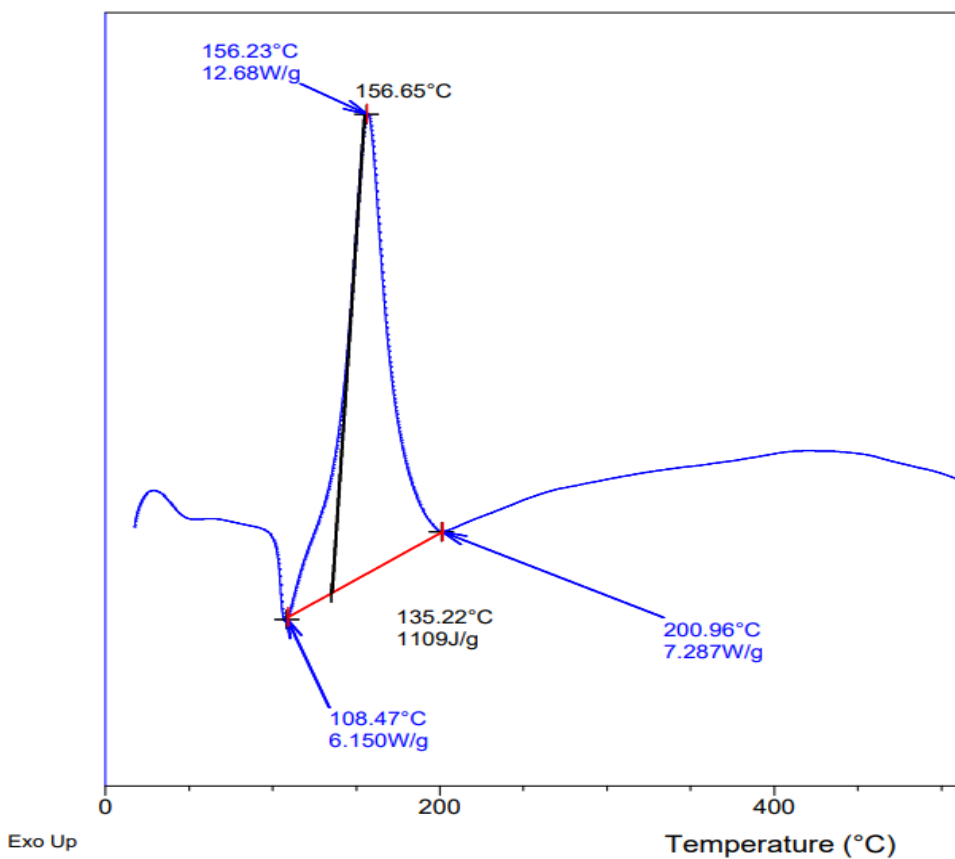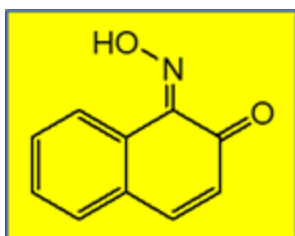

Sheets of glassy carbon

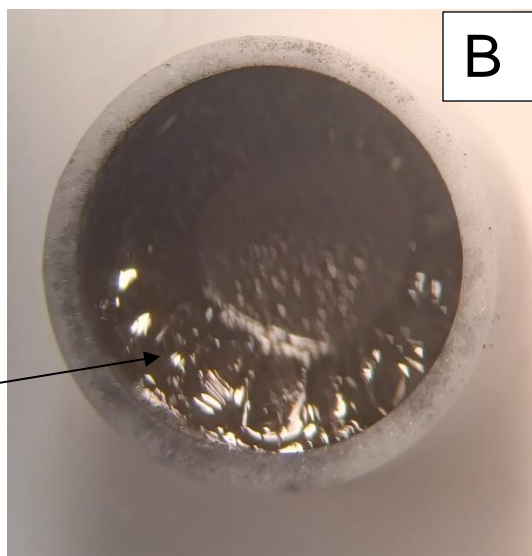



TG/DSC data for a powdery sample of pure ligand, **HL**<sup>2</sup>: **A** – panoramic view of both weight loss trace and heat flow; **B** – individual weight loss trace.

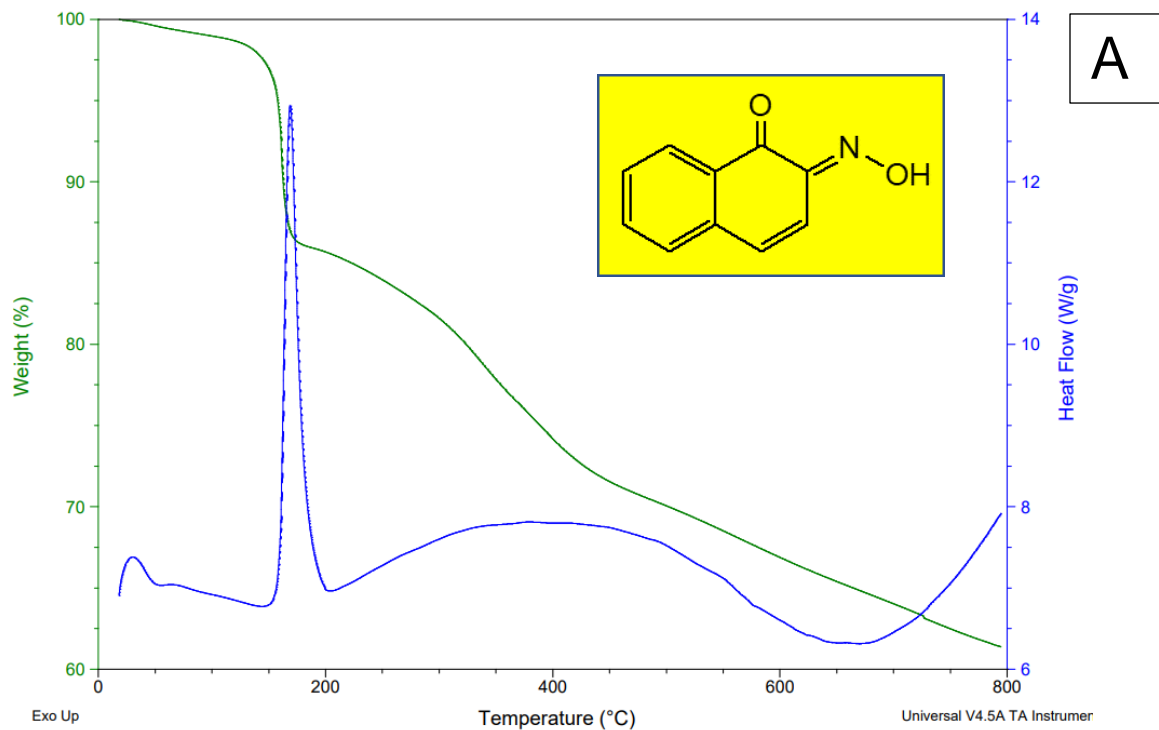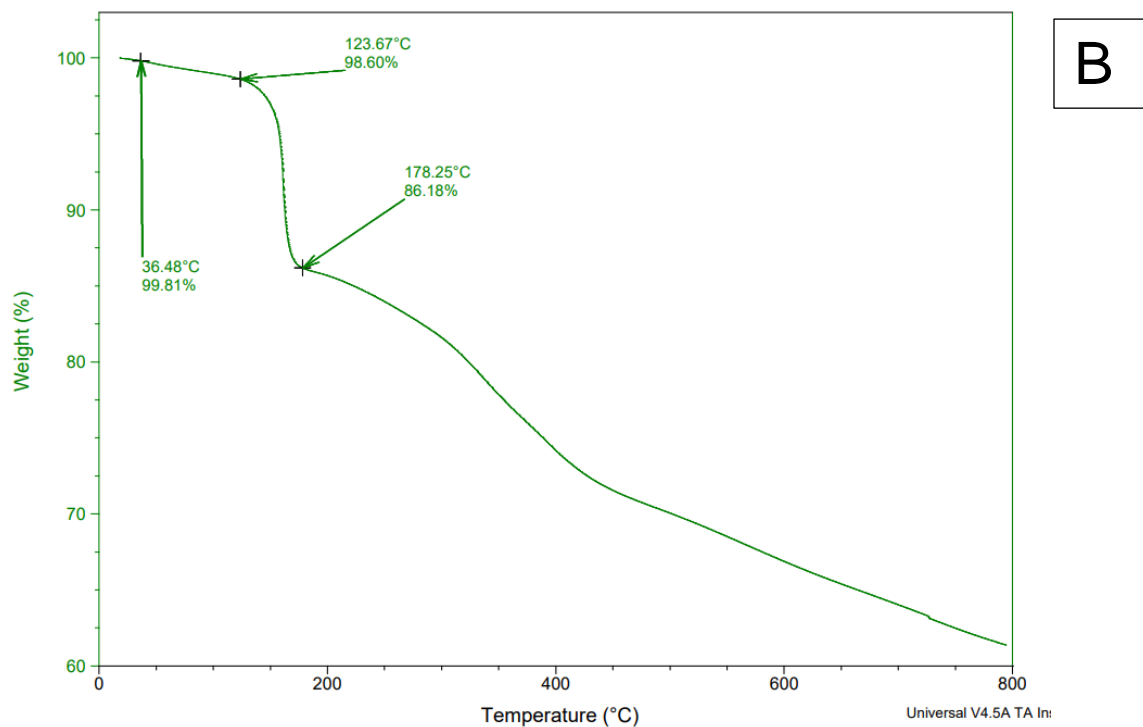



Details of the heat flow trace for **HL<sup>2</sup>** showing a strong exothermic peak in the range before 500°C (**A**), and actual photograph under microscope crucible content after TG/DSC experiment showing the formation of a glassy carbon upon heating under an inert atmosphere (**B**).

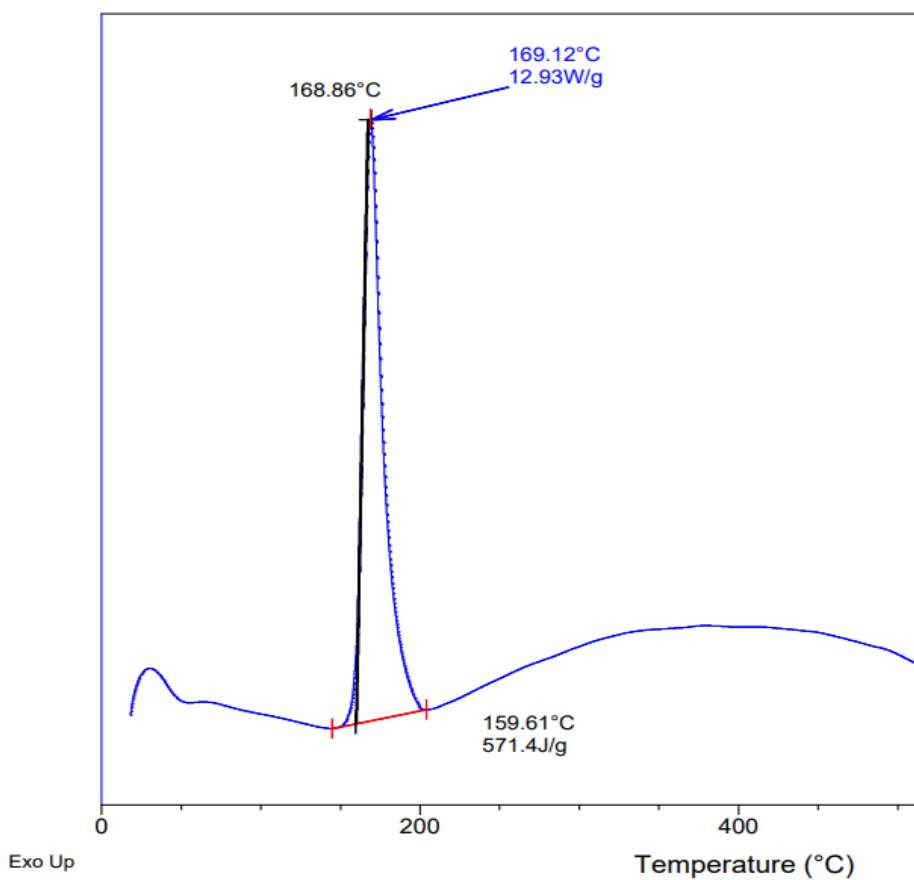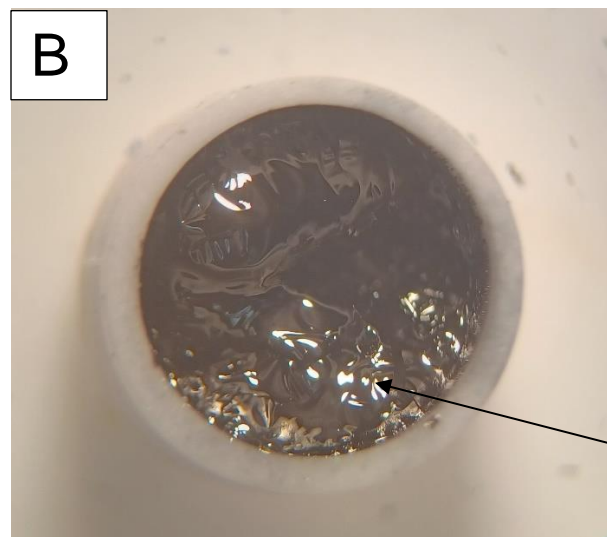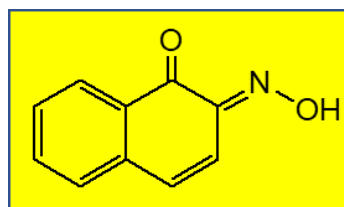

Sheets of glassy carbon

TG/DSC data for a sample of  $\text{PtL}_2$  showing: **A** - panoramic view of both traces, and **B** - integrated strong exothermic effect of compound's decomposition above 300°C (bottom panel).

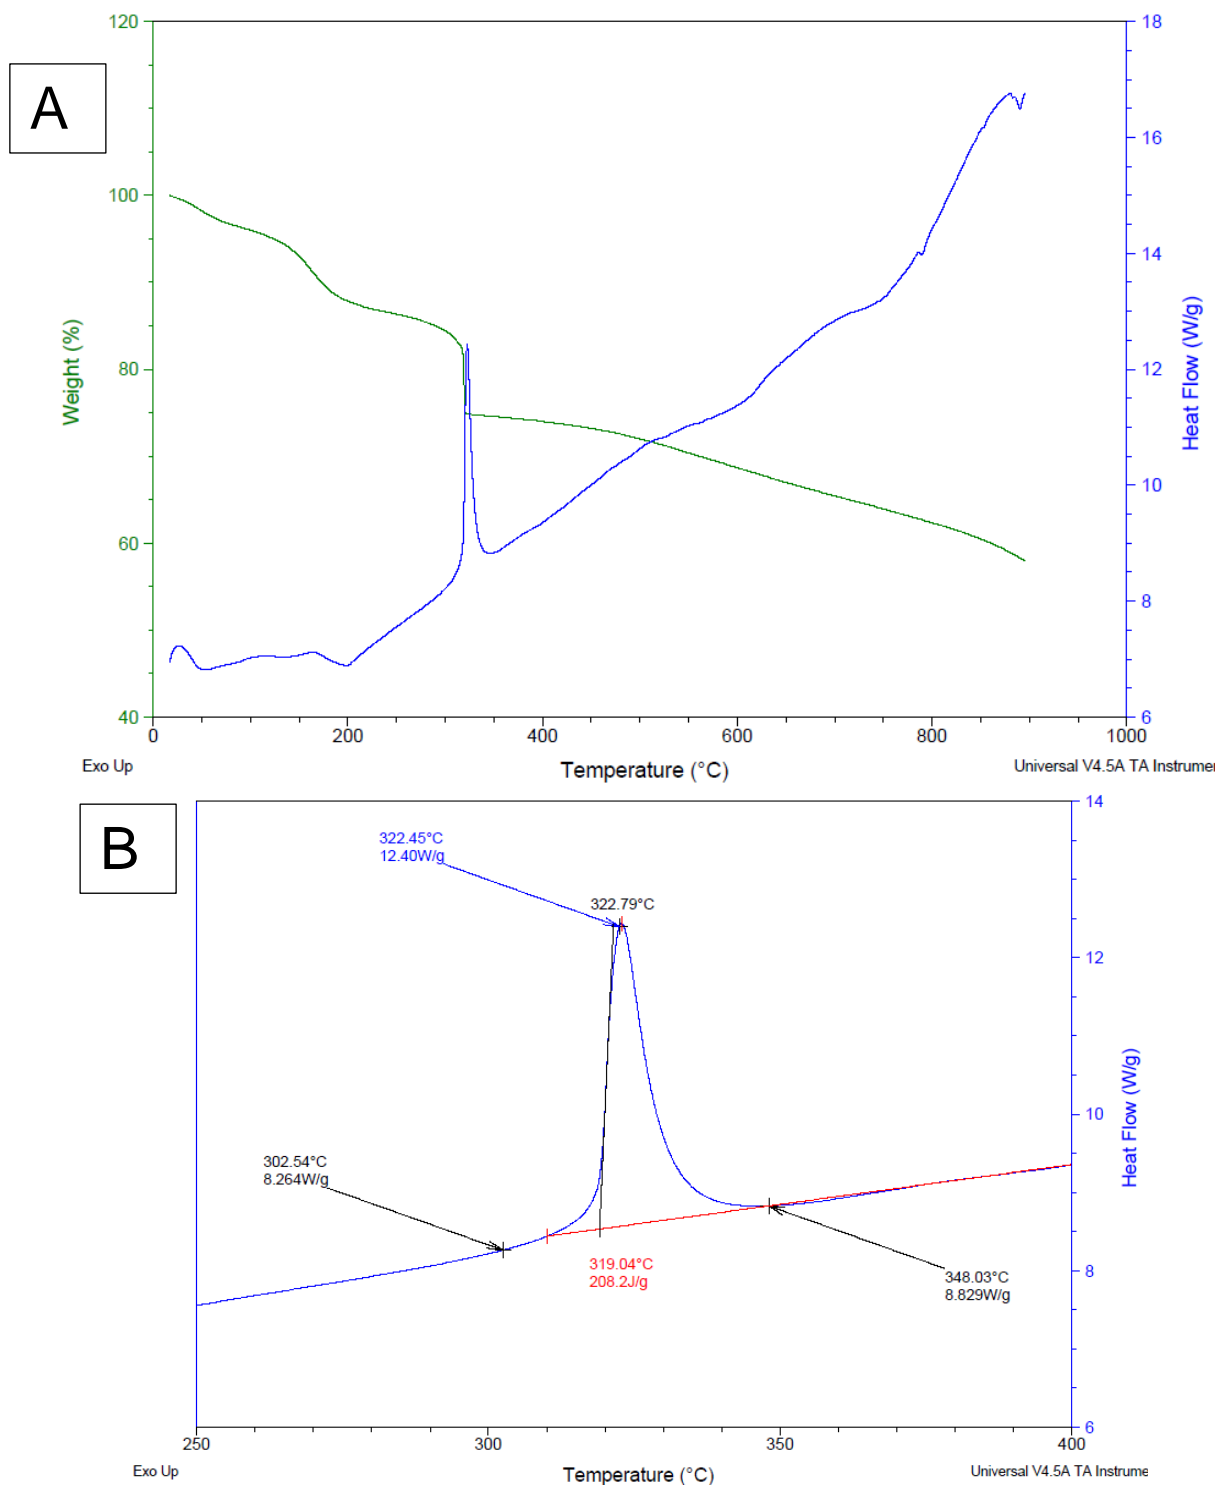

TG/DSC data for a sample of  $\text{PdL}_2$  showing: **A** - panoramic view of both traces, and **B** - integrated strong exothermic effect of compound's decomposition above 300°C (bottom panel).

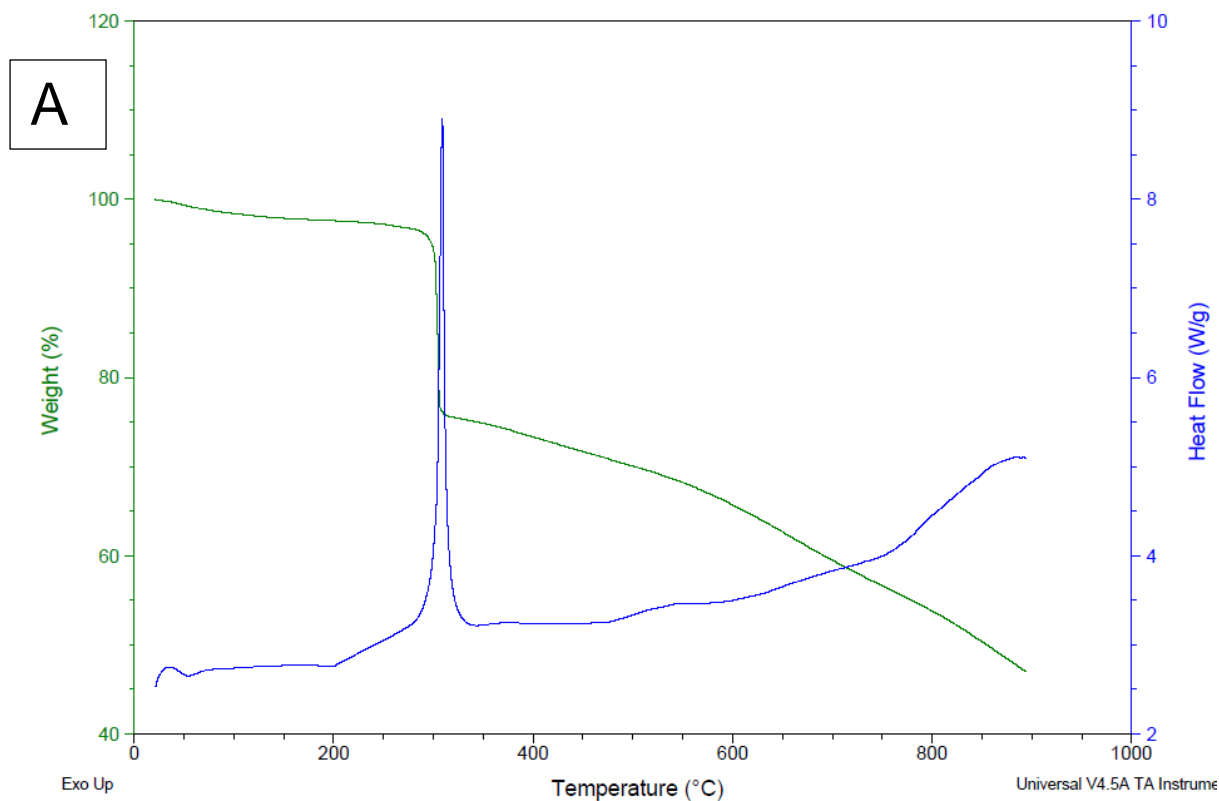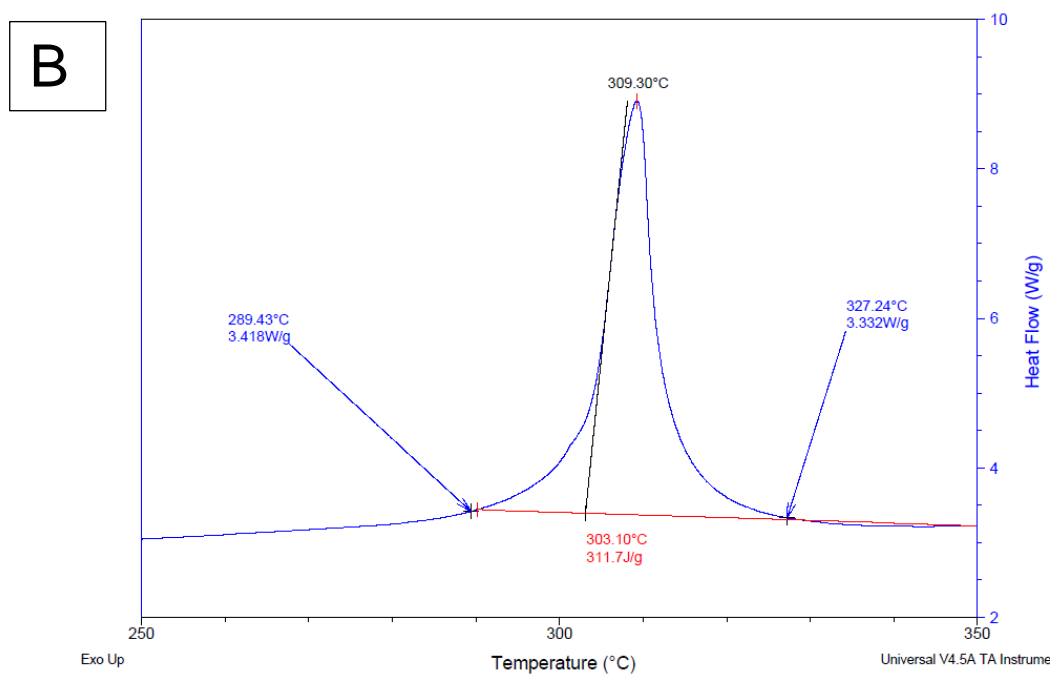

TG/DSC data for a sample of  $\text{PtL}^1_2$  showing traces of the weight loss (green line) and heat flow (blue line).

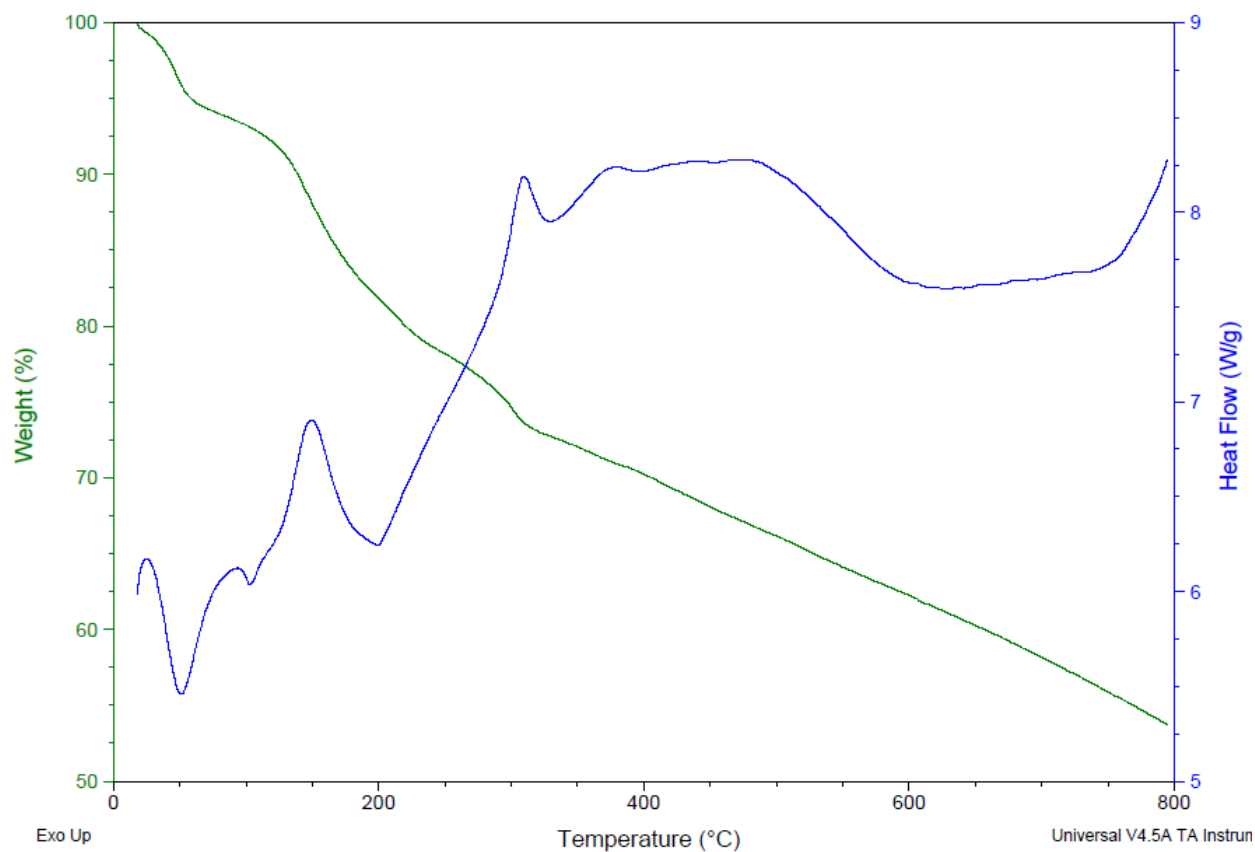

TG/DSC data for a sample of  $\text{PdL}_2$  showing traces of the weight loss (green line) and heat flow (blue line): **A** – panoramic view; **B** - integrated strong exothermic effect of compound's decomposition.

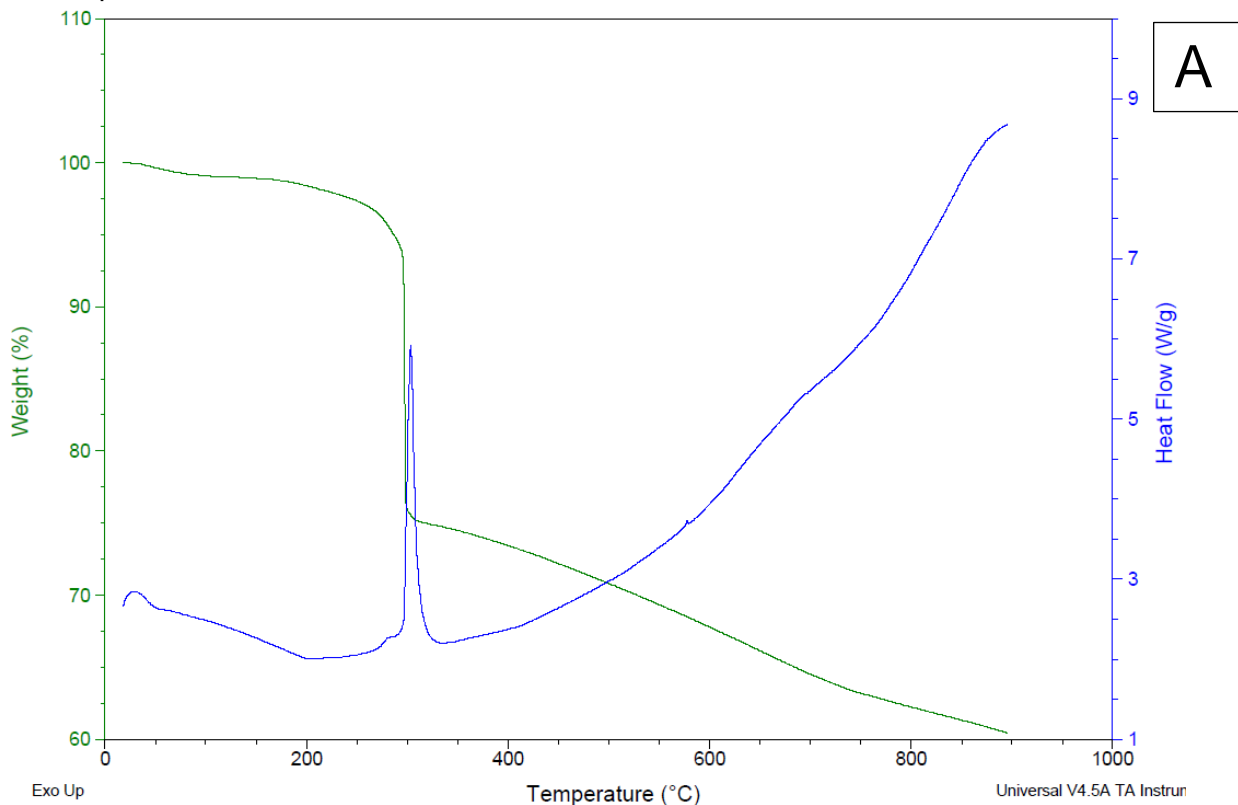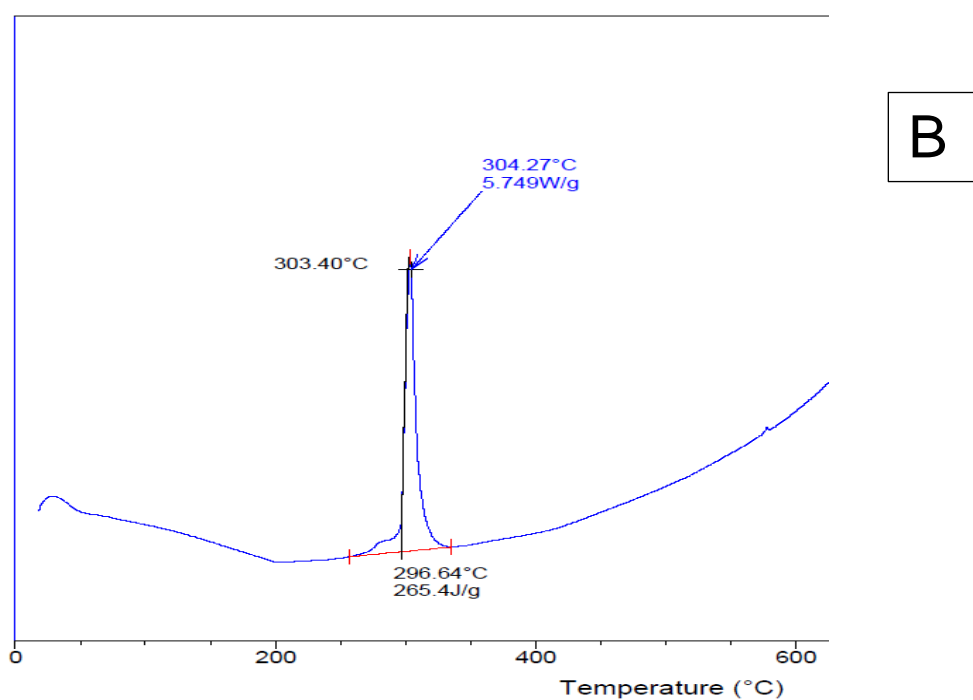

Photographs of alumina crucibles after thermal analysis experiments of synthesized Pt and Pd naphthoquinone-oximes. The formation of spongy metal residues as final products of decomposition is evident. They are not soluble in HCl and HNO<sub>3</sub>, but dissolve in *aqua regia*.

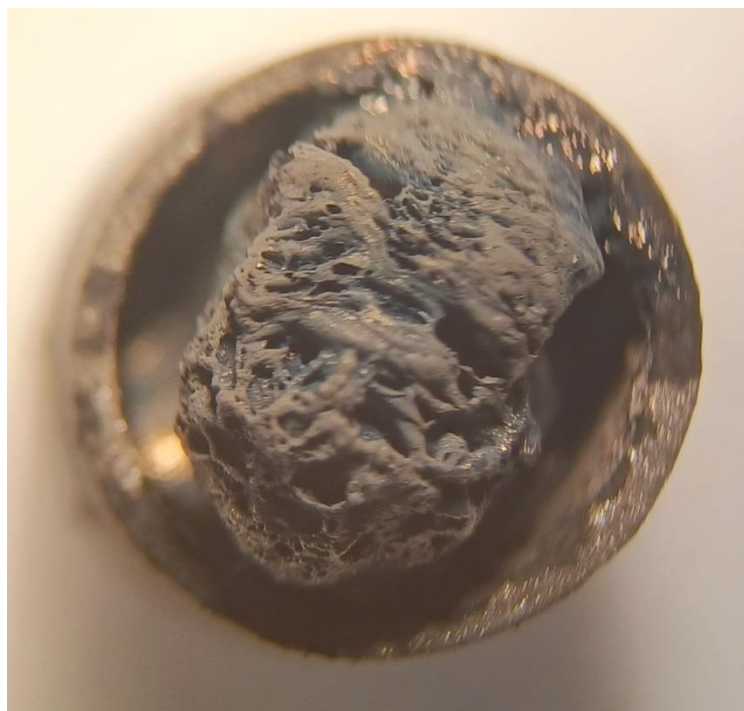

**Pd sponge**

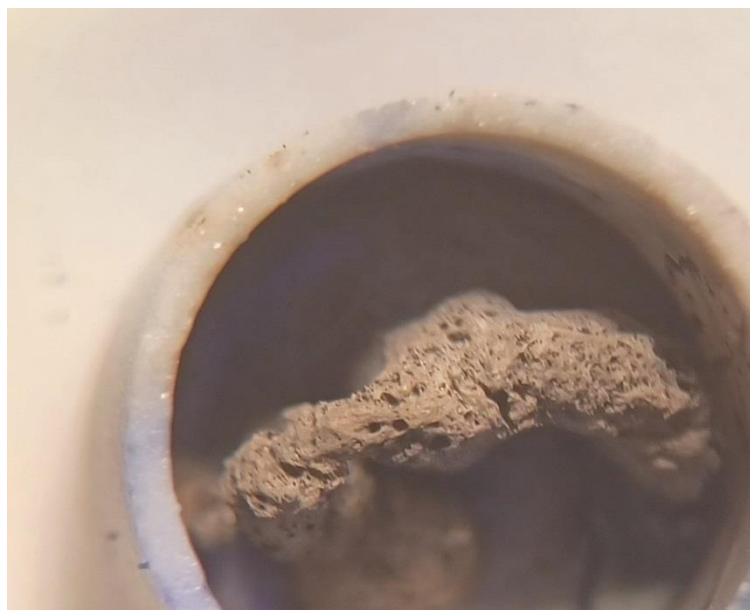

**Pt sponge**



Geometry of square-planar environment of Pt center in  $\text{PtL}_2$ ,  $\text{CH}_3\text{CN}$ -solvate: **A** – bonds, **B** – angles.

**A**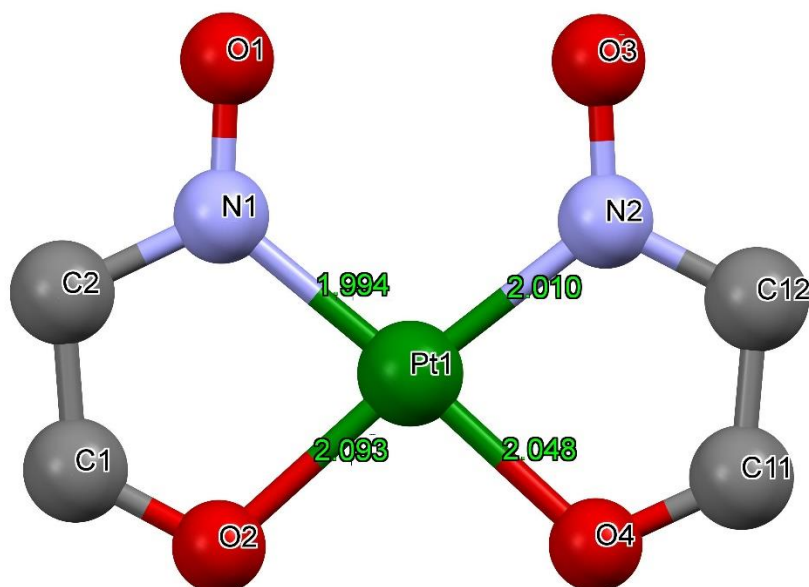**B**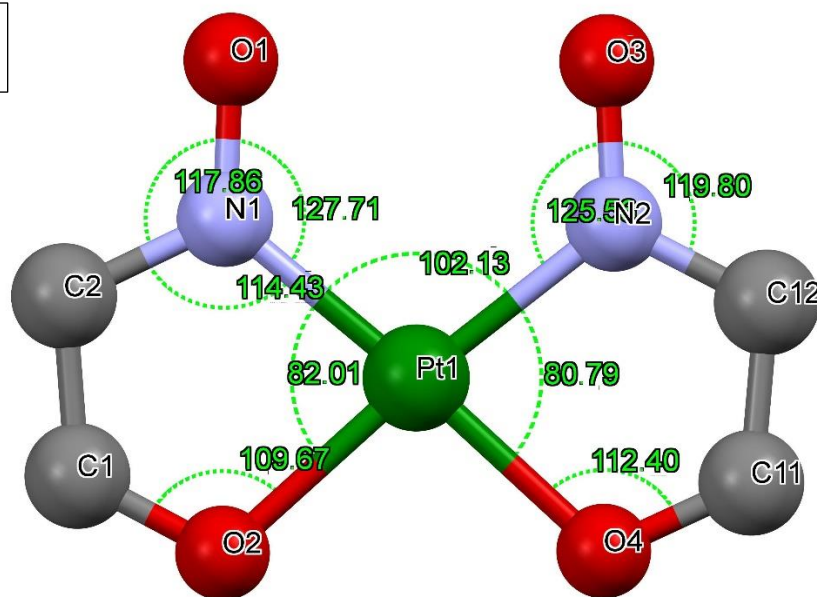

The prospective view along a direction of the unit cell content in the structure of  $\text{PtL}_2^2$ , *acetonitrile solvate* showing solvent molecules in the unit cell indicated by arrows.

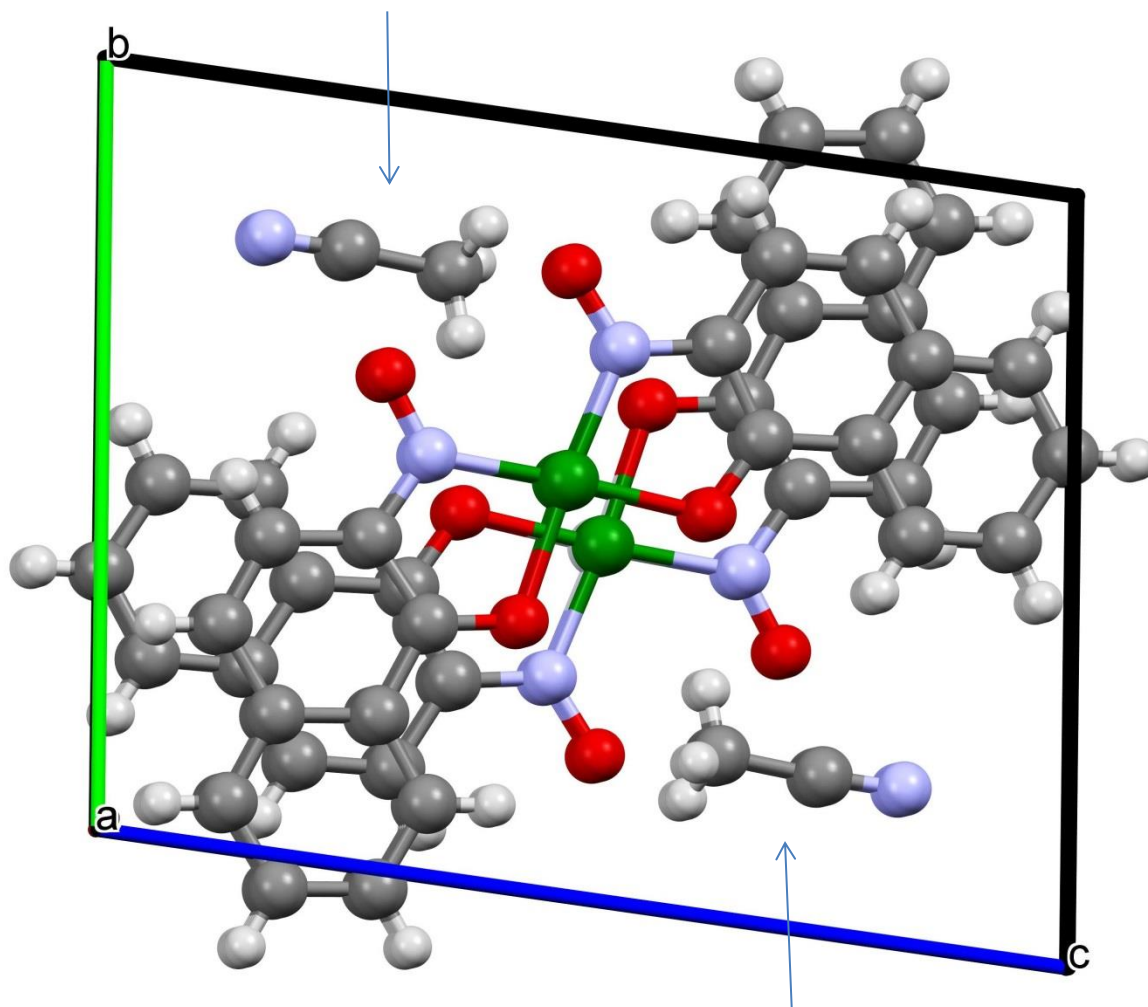

Pruned view of several unit cells along c direction showing the geometry of “Pt-wires” in the structure of  $\text{PtL}_2$ , *acetonitrile solvate*. Only metal centers are shown in their van-der-Waals size. The structure represents 1D-column built of dimers with metallophilic interactions in them and connected into a zigzag chain with  $\sim 145^\circ$  angle.

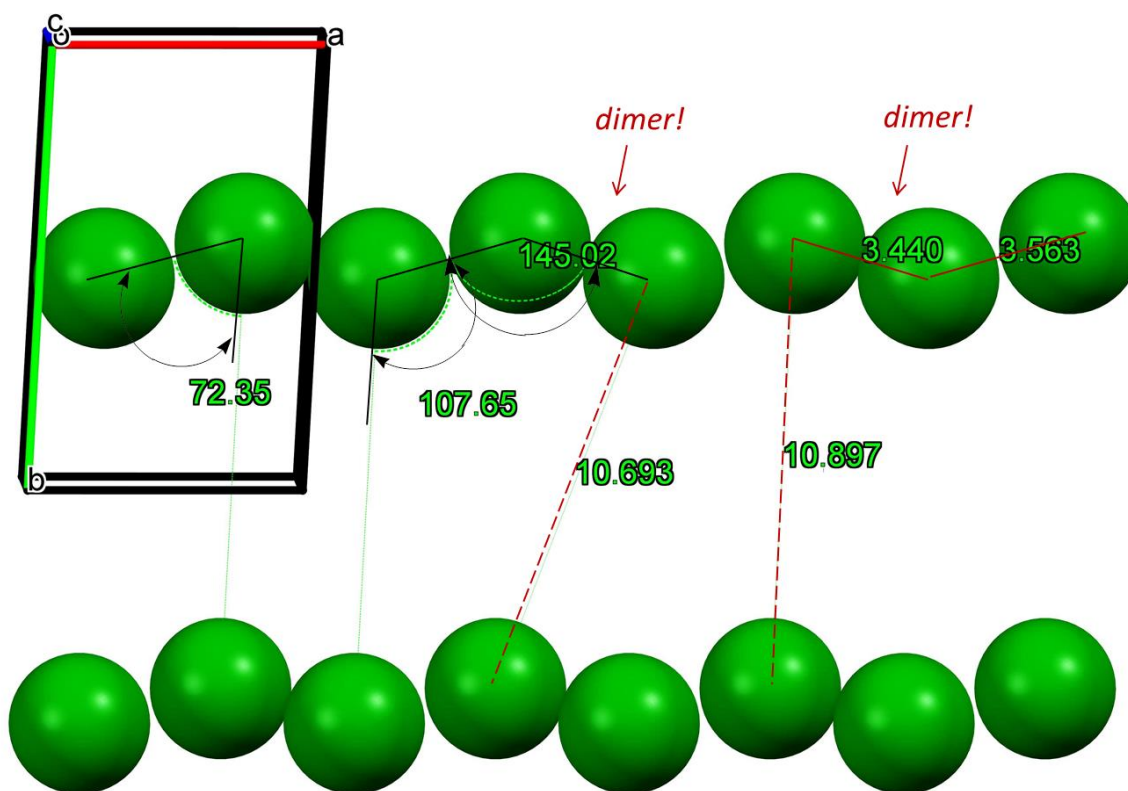

The ASU in the structure of  $\text{PtL}_2$ , **acetonitrile solvate** showing: **A** - closest C-H...O contacts between oxygen atoms of the naphtol-groups in the metal complex and H-atoms in the solvent molecule, **B** - angles in these contacts. This specific solvent molecules insertion in this complex is **different** from such in the second complex with nitrobenzene.

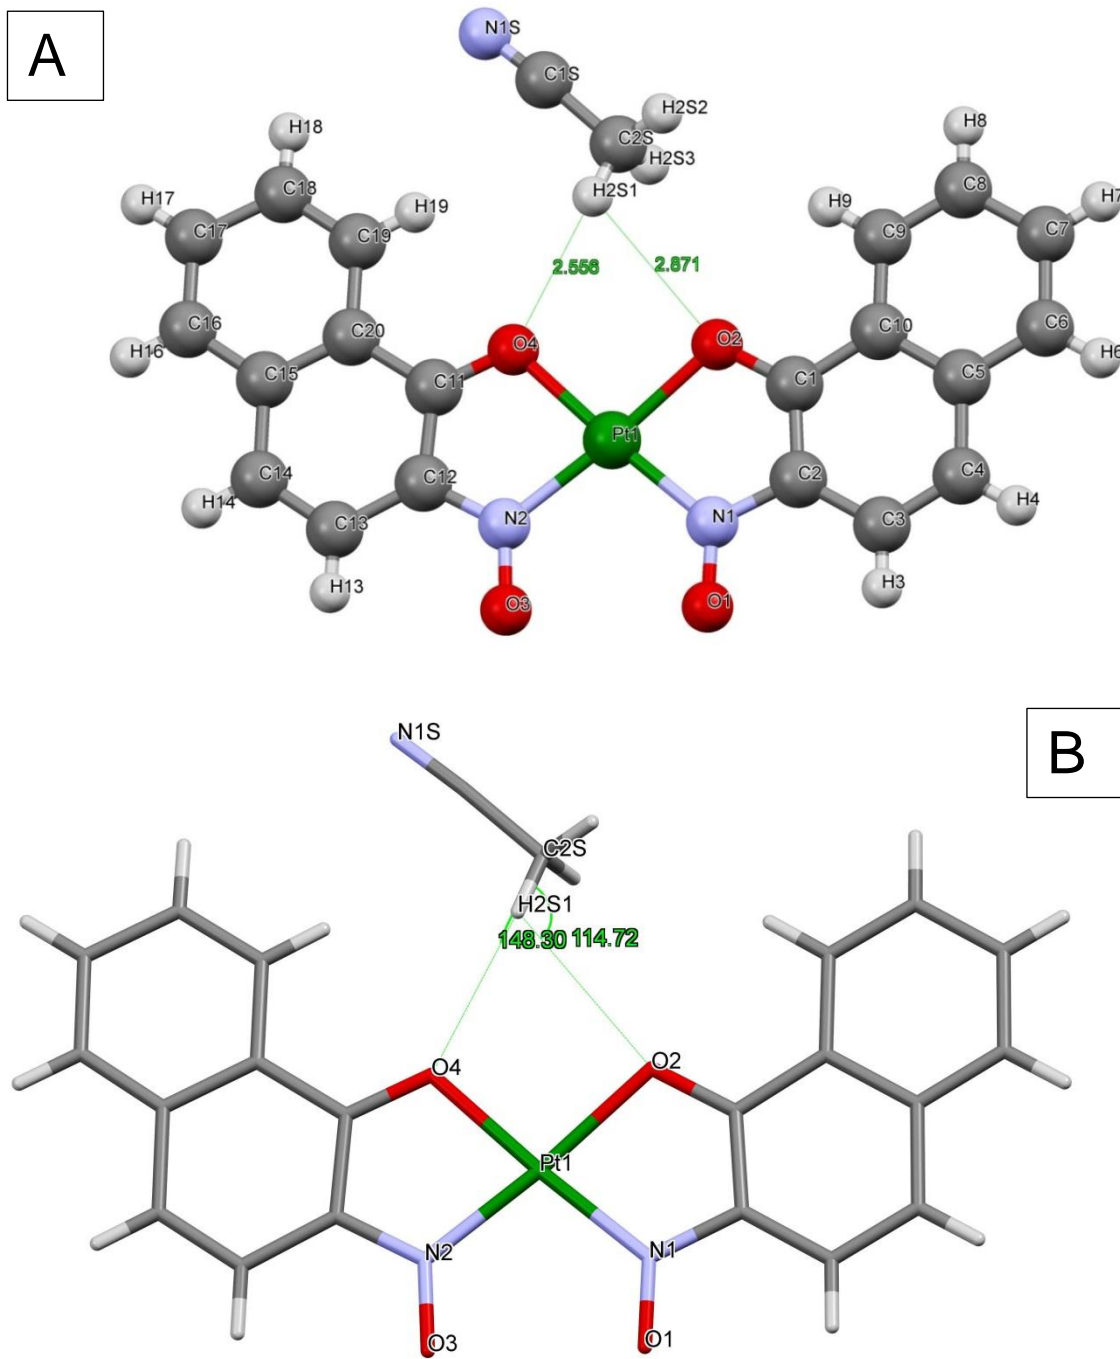

Geometry of square-planar environment of Pt center in  $\text{PtL}_2$ ,  $\text{C}_6\text{H}_5\text{NO}_2$ -solvate: **A** – bonds, **B** – angles.

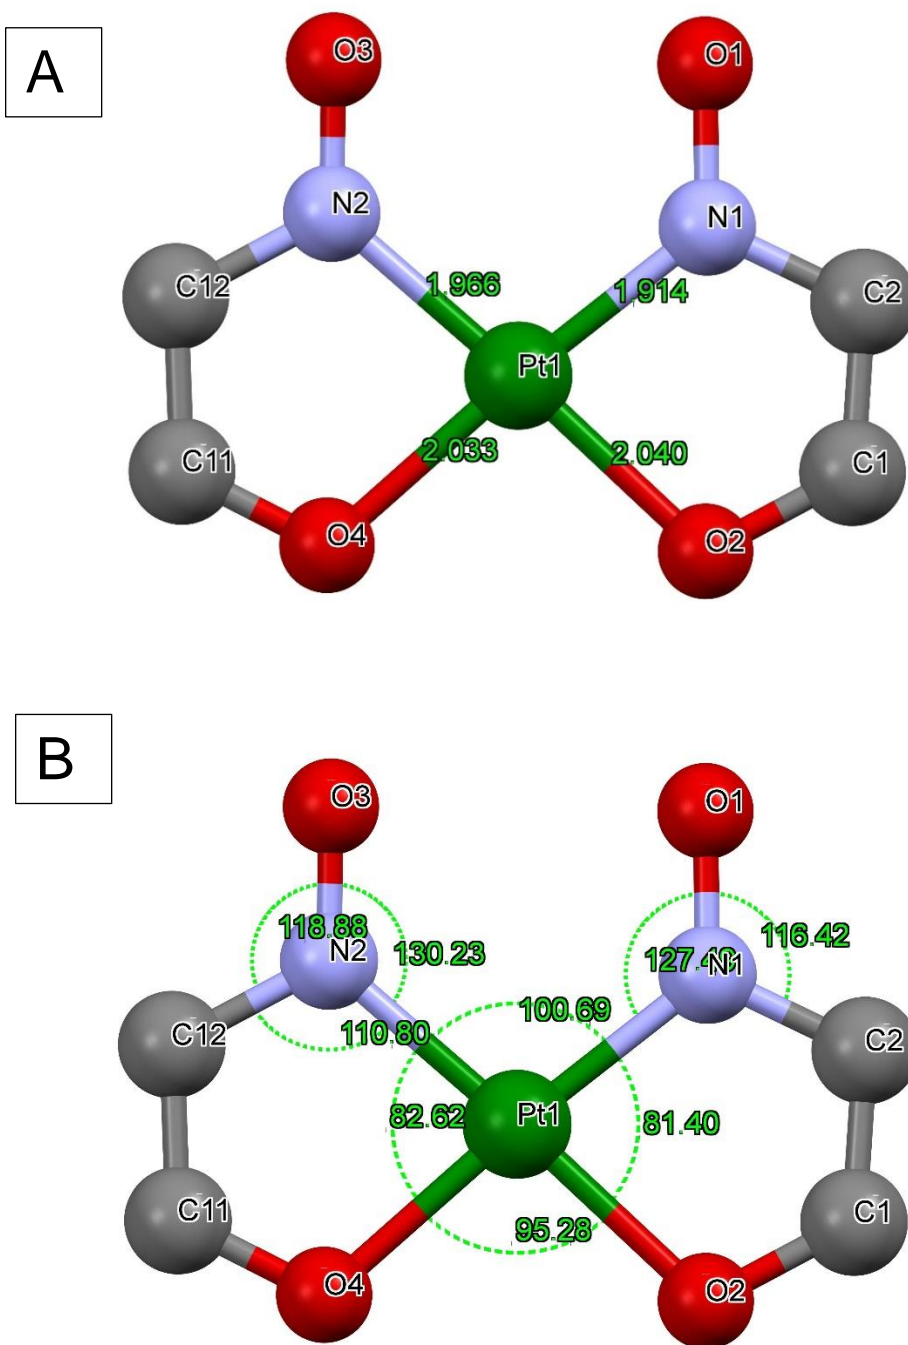

The prospective view along a direction of the unit cell content in the structure of  $\text{PtL}_2$ , **nitrobenzene solvate** showing solvent molecules positioned in corners of the unit cell indicated by arrows.

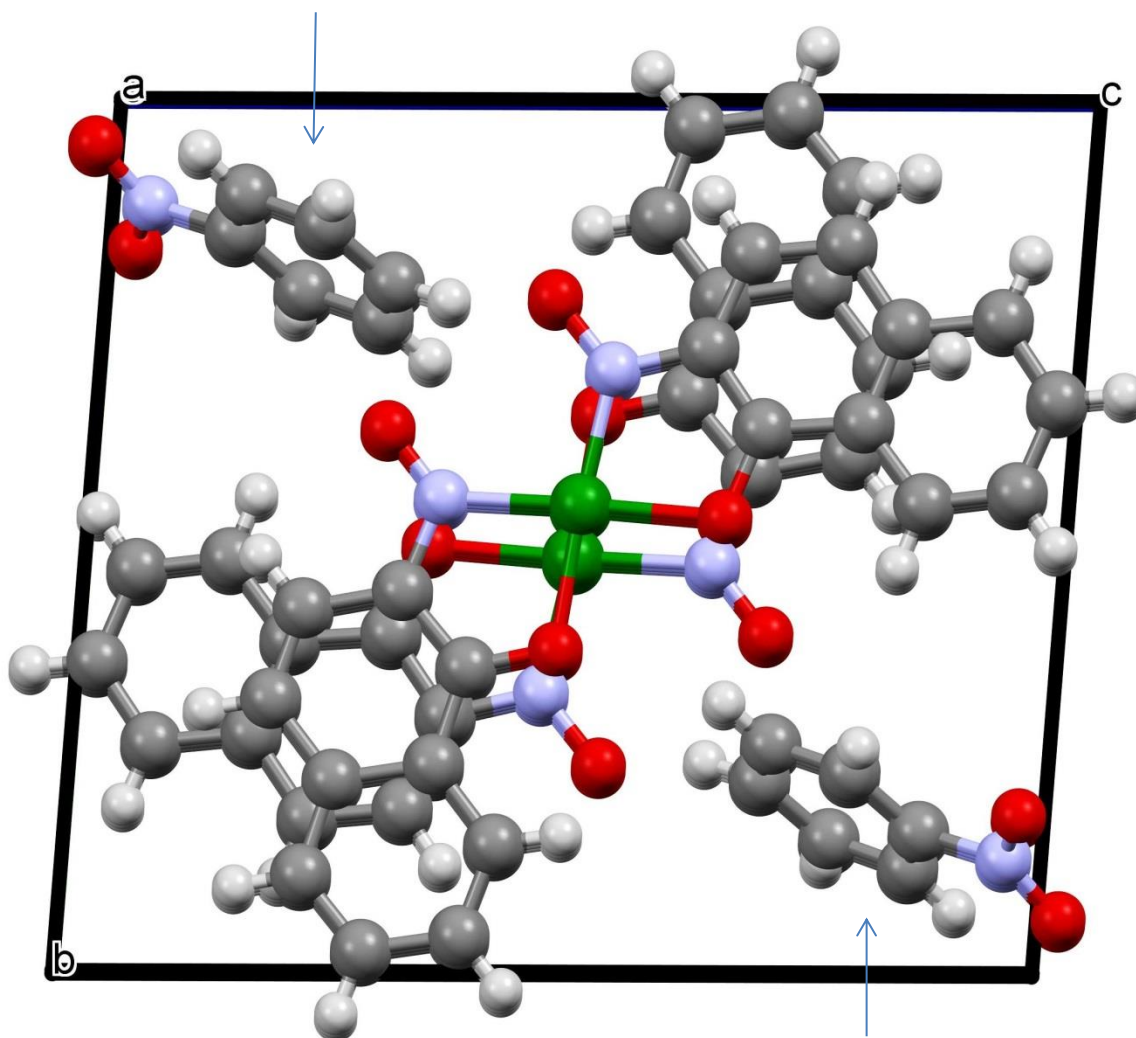



Pruned view of several unit cells along c direction showing the geometry of “Pt-wires” in the structure of  $\text{PtL}_2$ , **nitrobenzene solvate**. Only metal centers are shown in their van-der-Waals size. The structure represents 1D-column built of dimers with metallophilic interactions in them and connected into a zigzag chain with  $\sim 156^\circ$  angle.

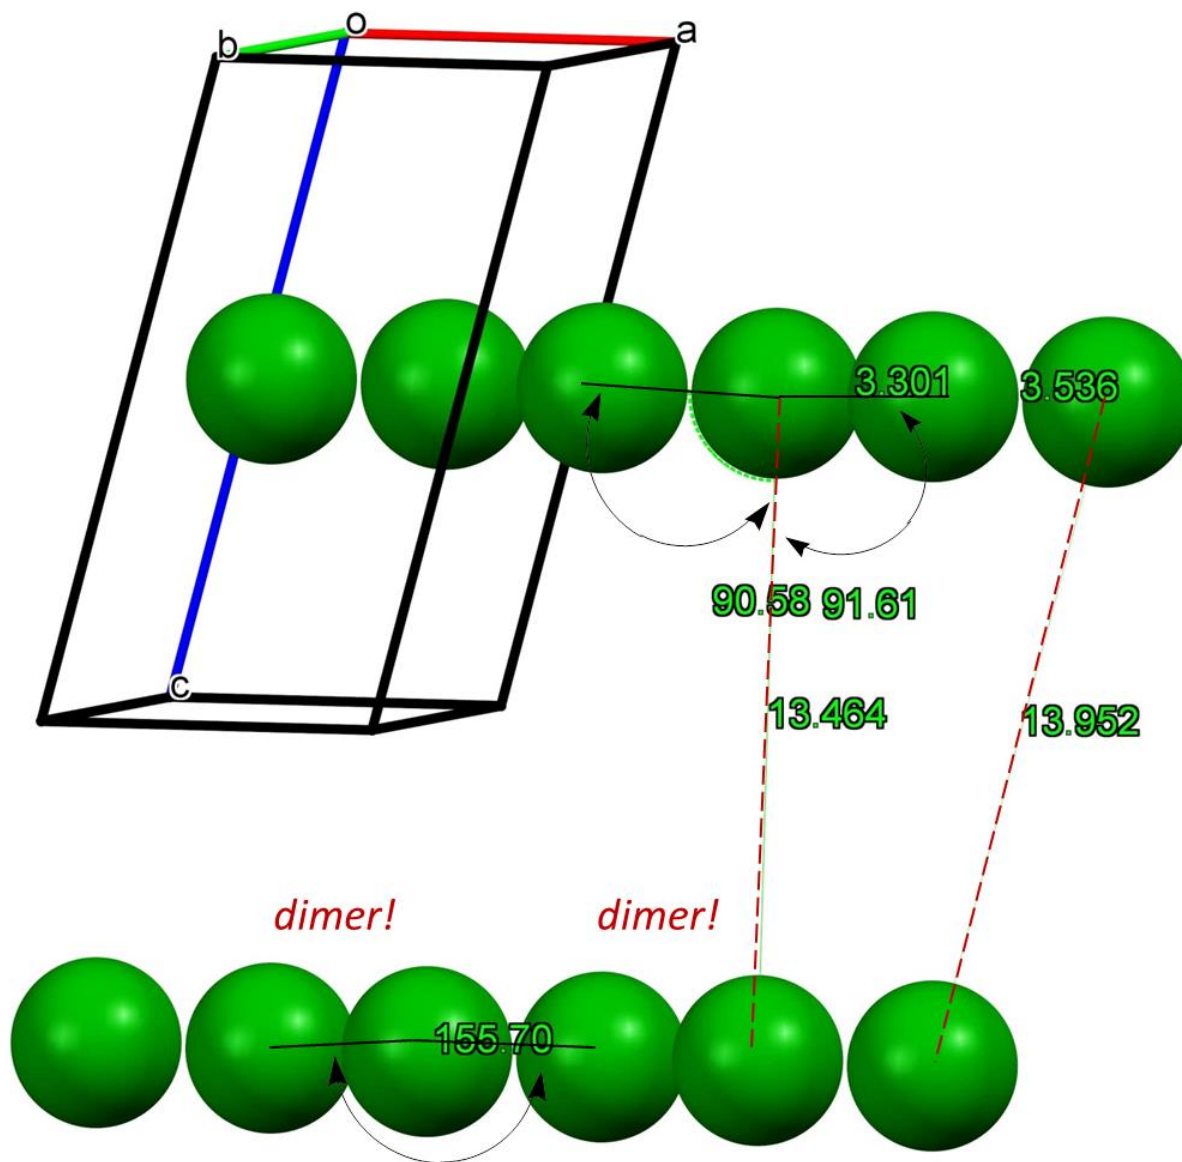

Further details of the structure of  $\text{PtL}_2$ , **nitrobenzene solvate** showing position of intercalating solvent molecule between two dimers: A – side view, B – top view.

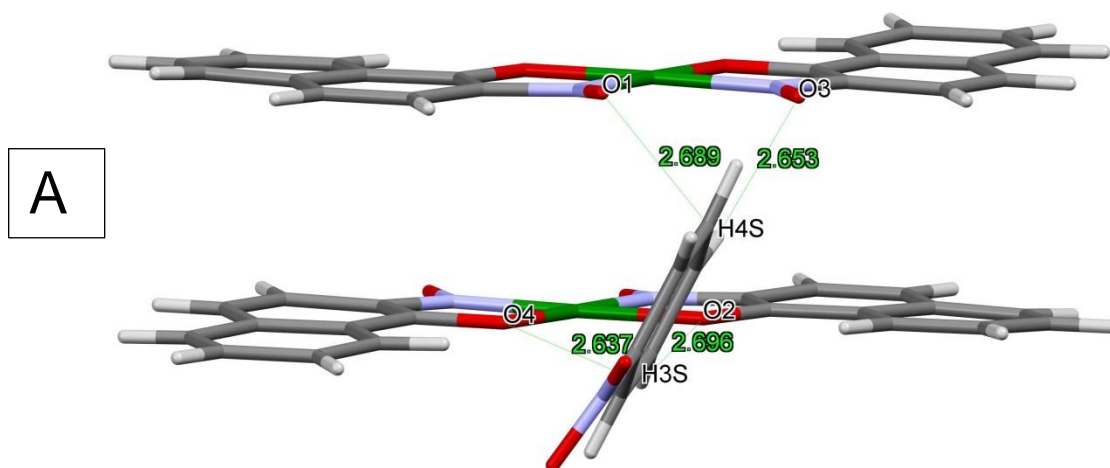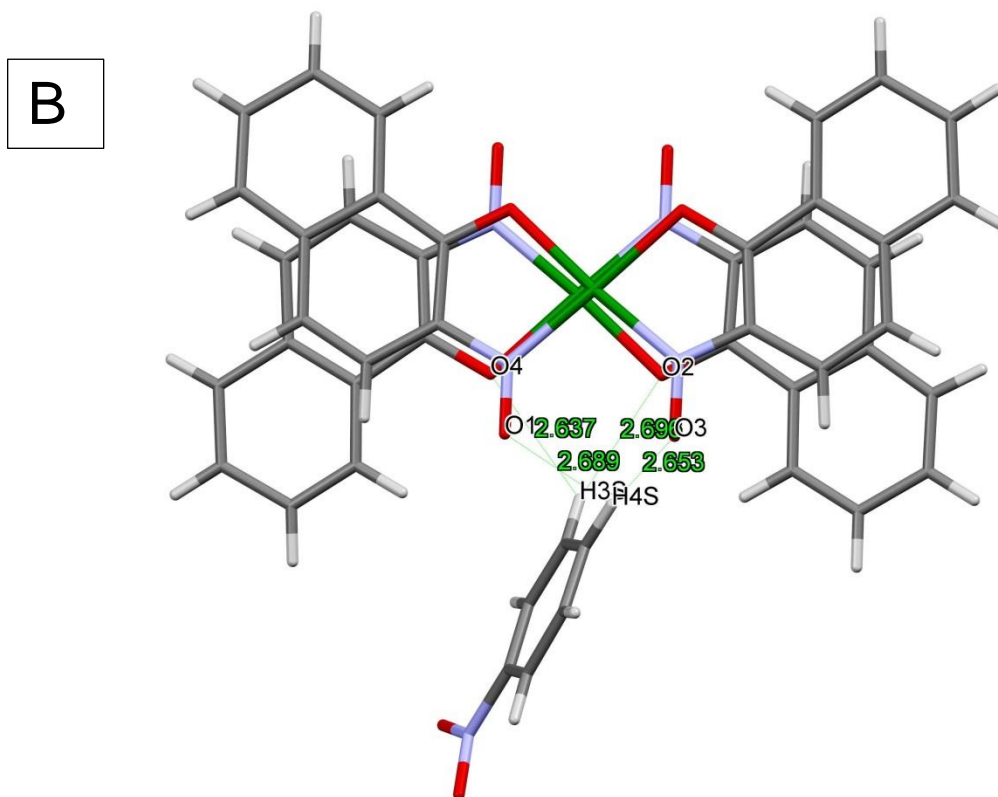

Details of the structure of  $\text{PtL}_2$ , **nitrobenzene solvate** showing bridging role of the solvent molecule located between 2 neighboring  $\pi$ -stacked units in the structure of 1D-column. Highlighted are the closest C-H...O contacts between oxygen atoms O1 and O3 of the nitroso-group and O2 and O4 oxygen atoms of the naphtol group (**A**), and respective angles (**B**).

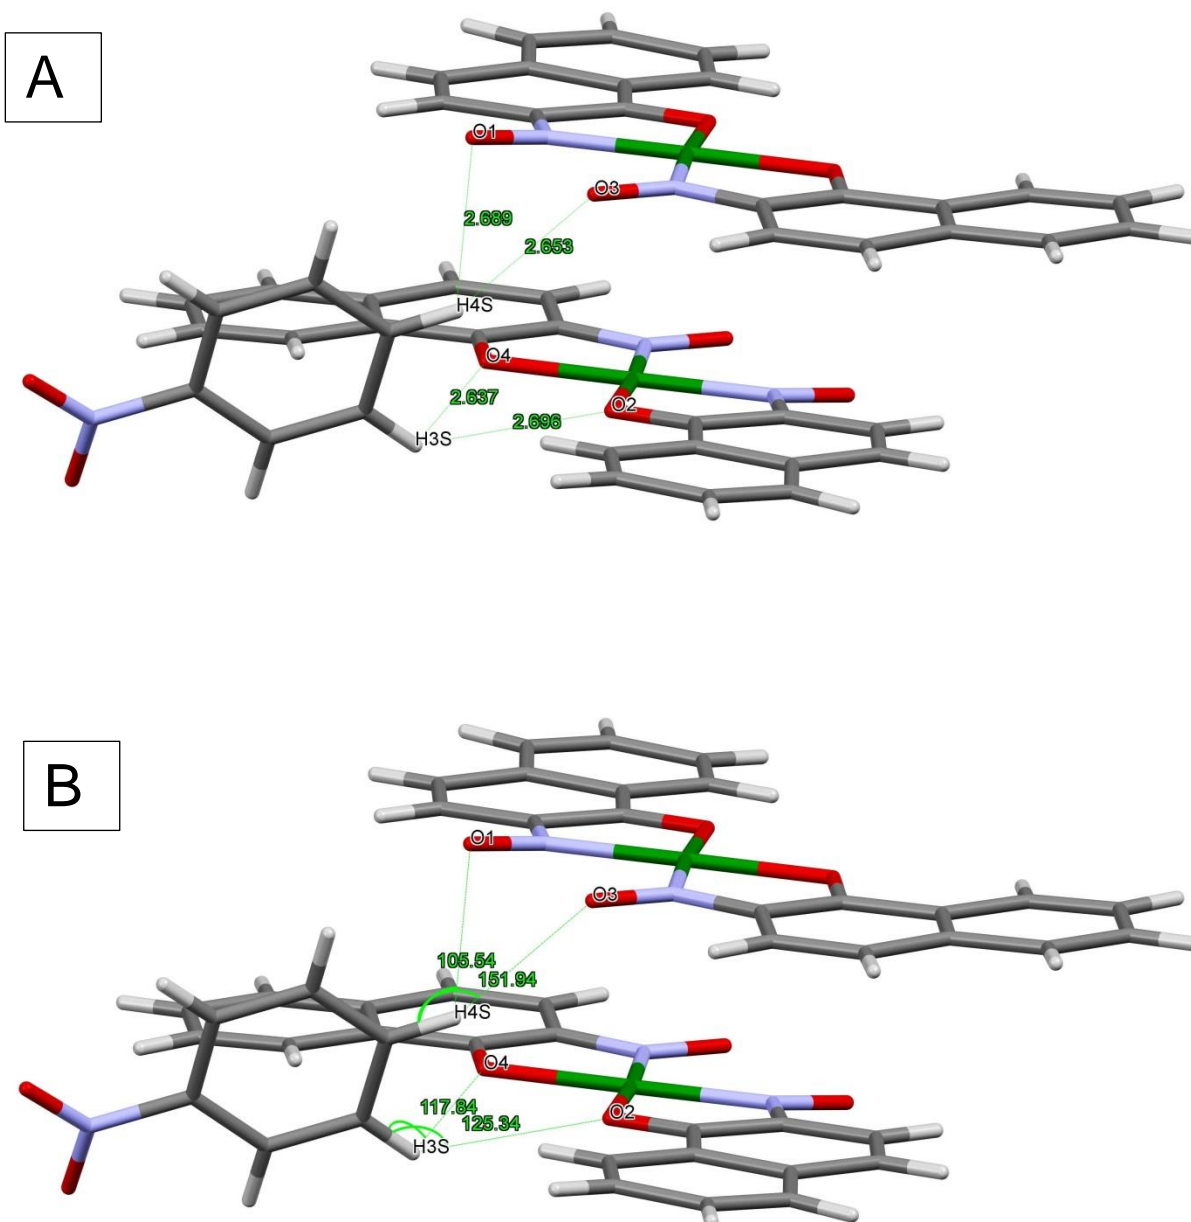

Fragment of the IR-spectrum of solid HL<sup>1</sup> in the fingerprint region. Weak  $\nu(\text{C-H})$  aromatic band is observed at 3065, 3020  $\text{cm}^{-1}$

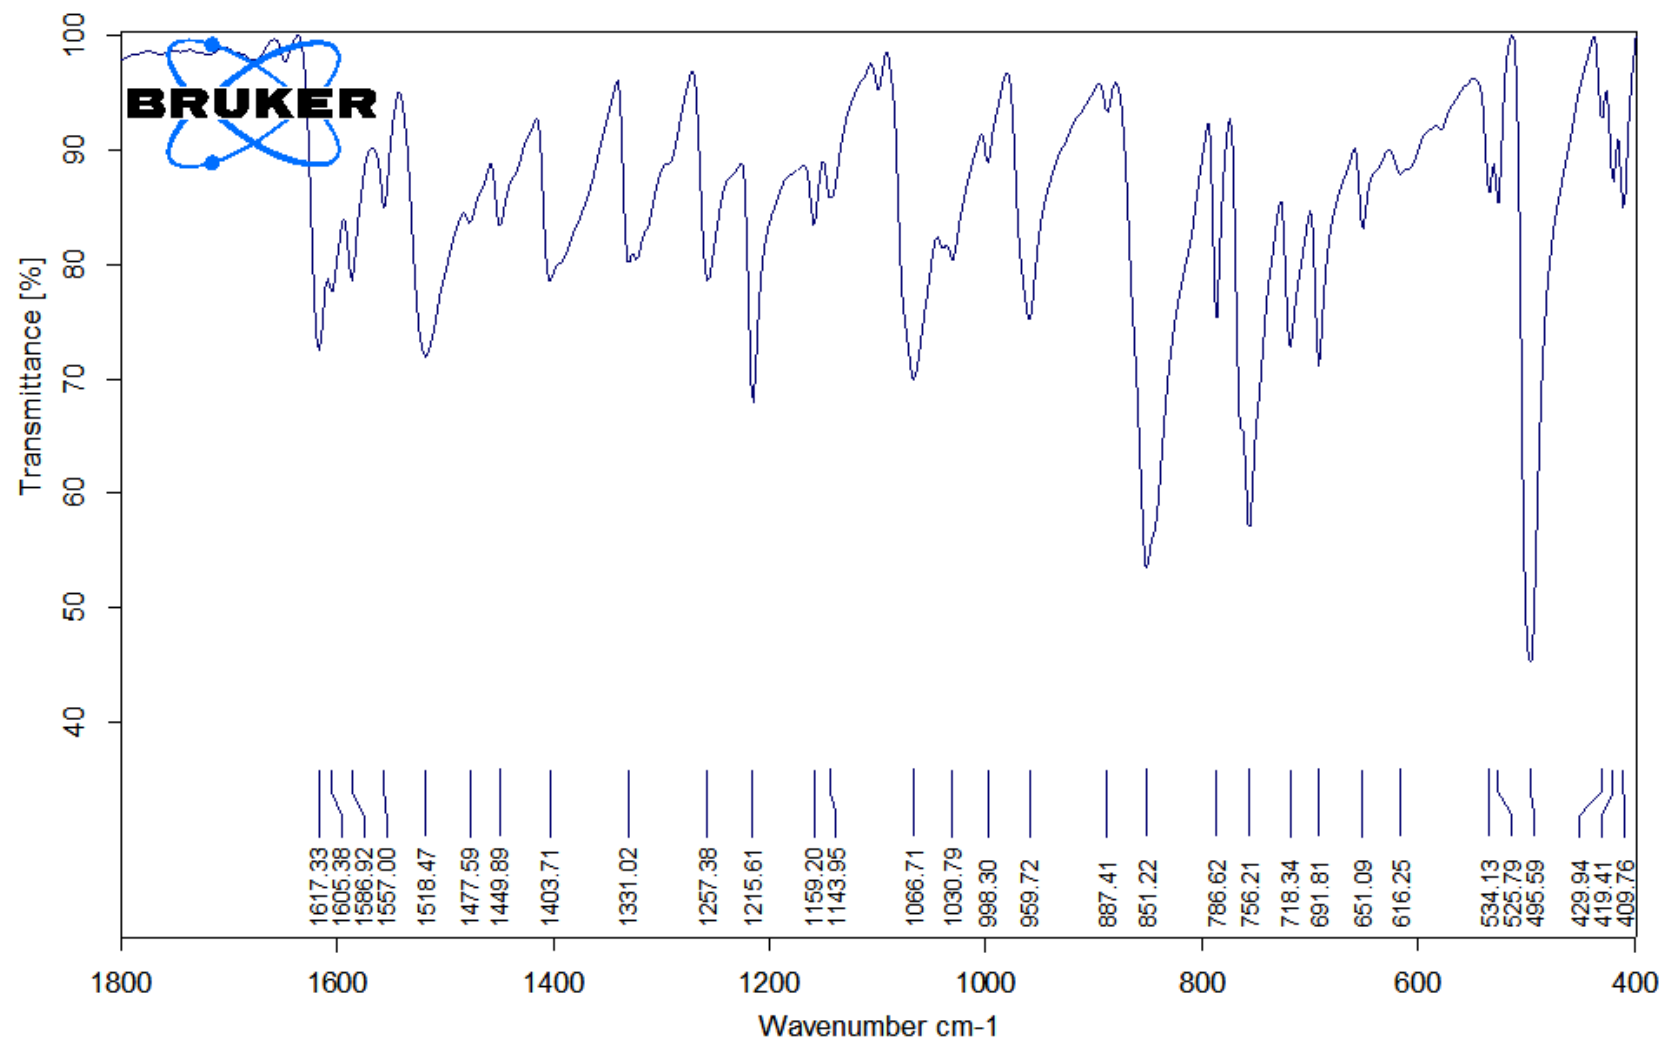

Fragment of the IR-spectrum of solid HL<sup>2</sup> in the fingerprint region. Weak  $\nu(\text{C-H})$  aromatic band is observed at 3085, 2973  $\text{cm}^{-1}$

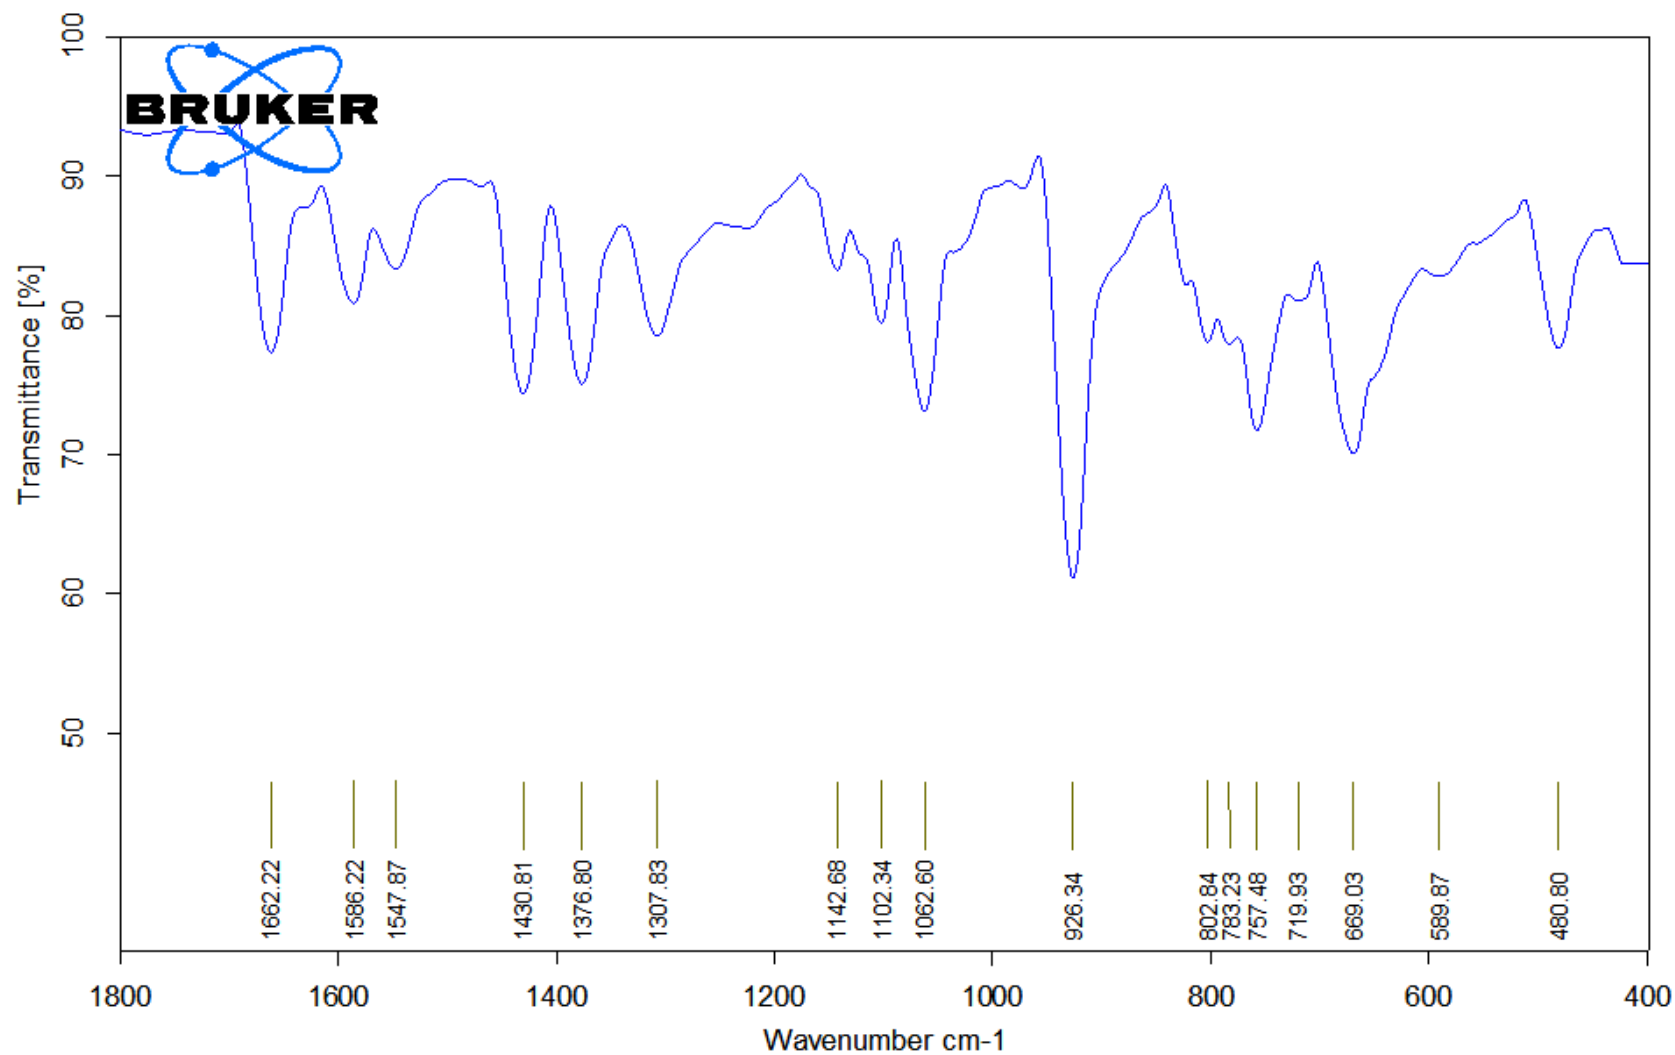

Fragment of the IR-spectrum of solid  $\text{PdL}_2$  in the fingerprint region. Weak  $\nu(\text{C-H})$  aromatic band is observed at  $3047\text{ cm}^{-1}$

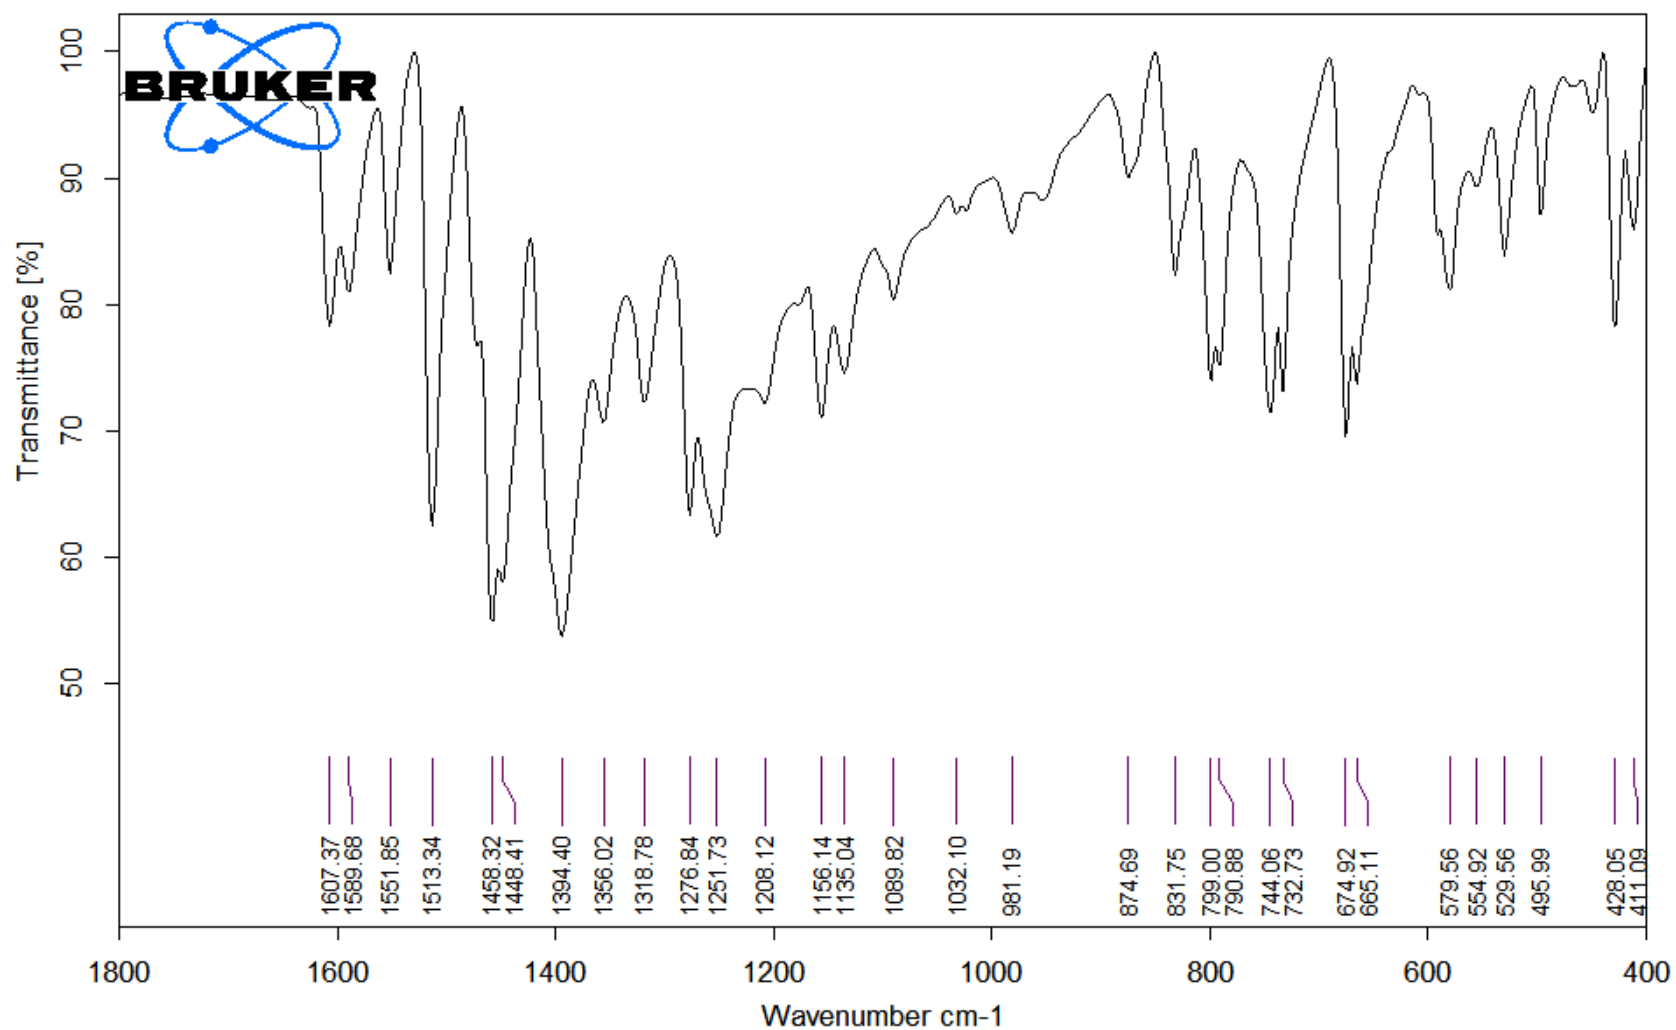



Fragment of the IR-spectrum of solid  $\text{PdL}_2$  in the fingerprint region. Weak  $\nu(\text{C-H})$  aromatic band is observed at  $3058\text{ cm}^{-1}$

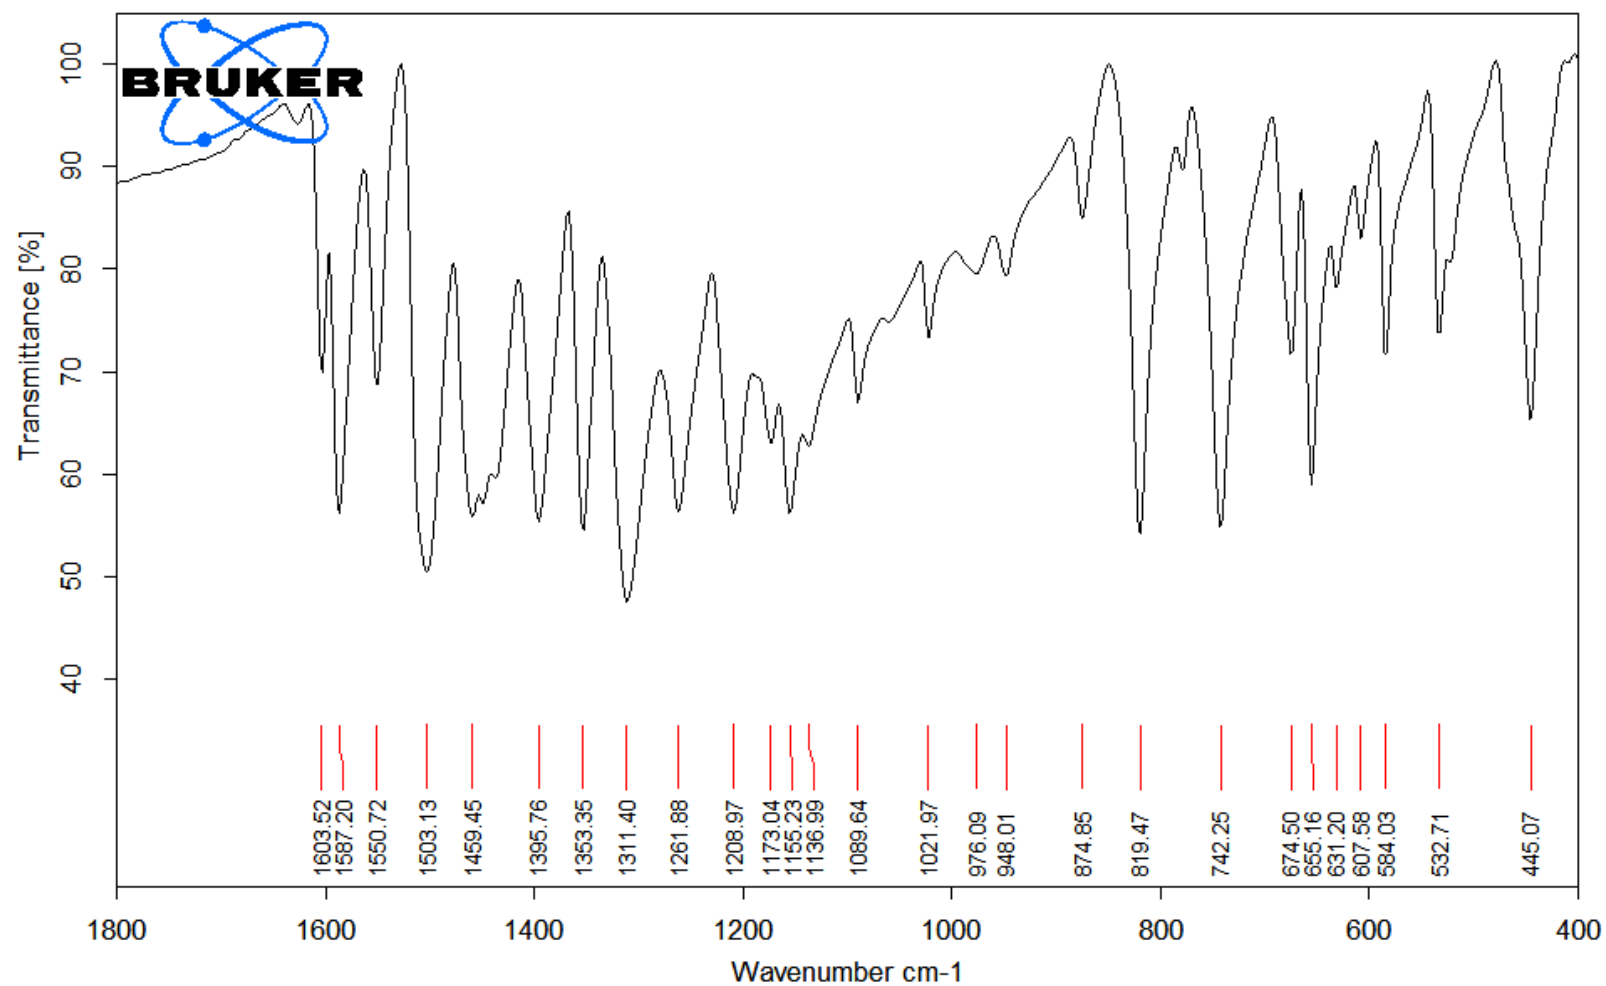

Fragment of the IR-spectrum of solid  $\text{PtL}_2^1$  in the fingerprint region. Weak  $\nu(\text{C-H})$  aromatic band is observed at  $3057\text{ cm}^{-1}$

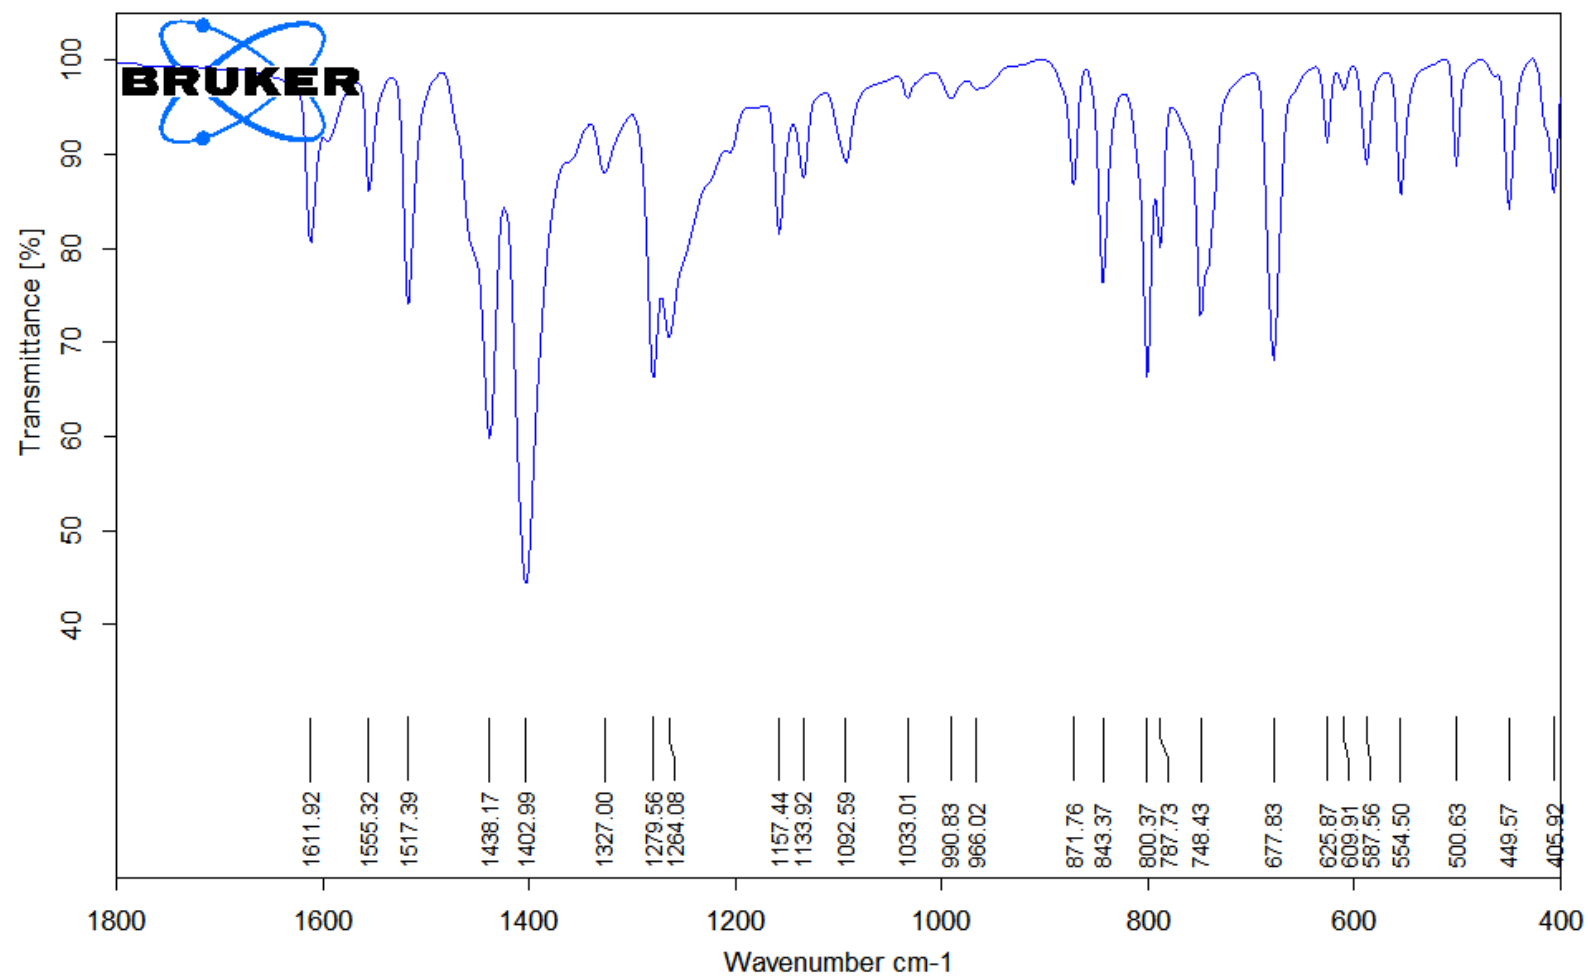

Fragment of the IR-spectrum of solid  $\text{PtL}^1_2$  in the fingerprint region. Weak  $\nu(\text{C-H})$  aromatic band is observed at  $3065\text{ cm}^{-1}$

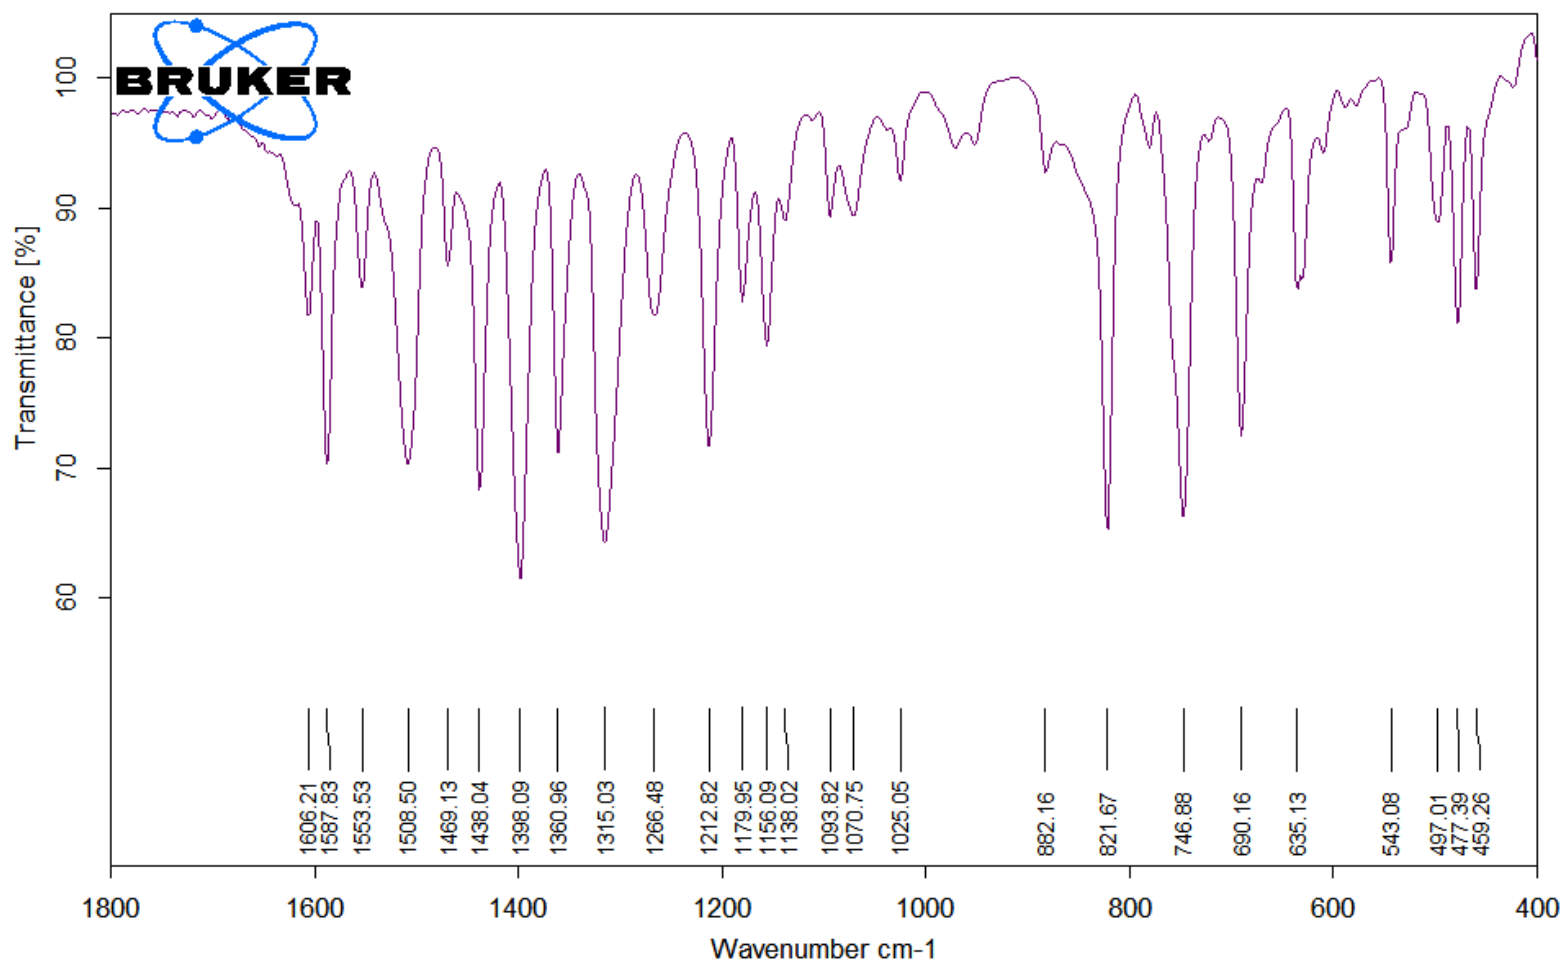

Spectra of diffuse reflectance (recorded in absorbance mode) of solid powders of Pt(II) naphtholo-oximes at 296 K in the range of 350-850 nm.

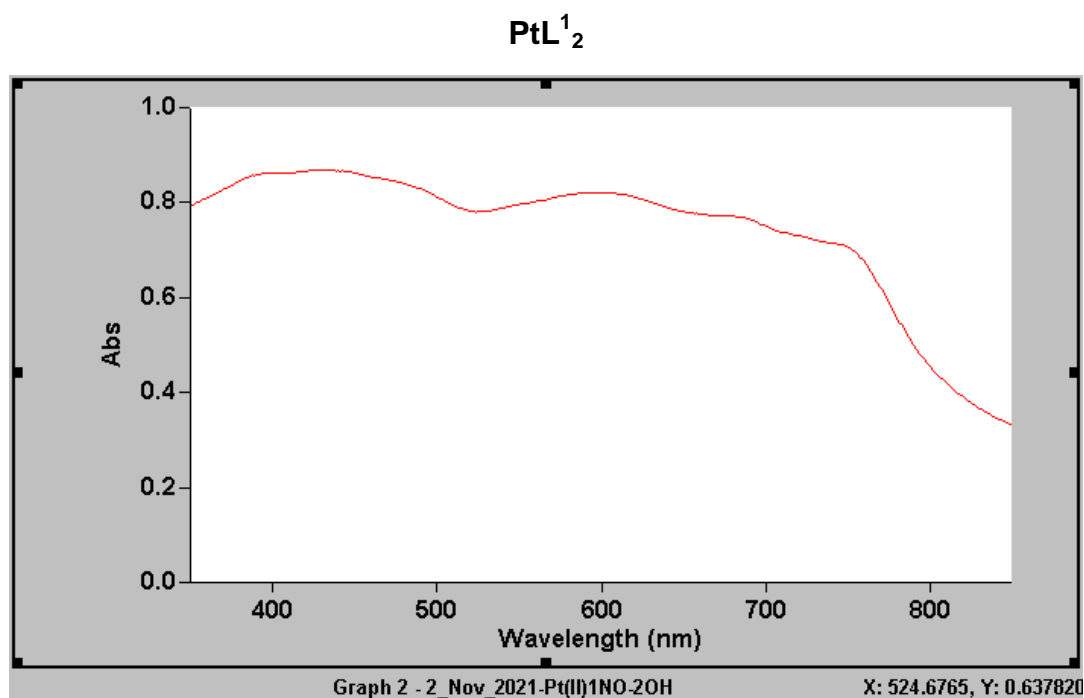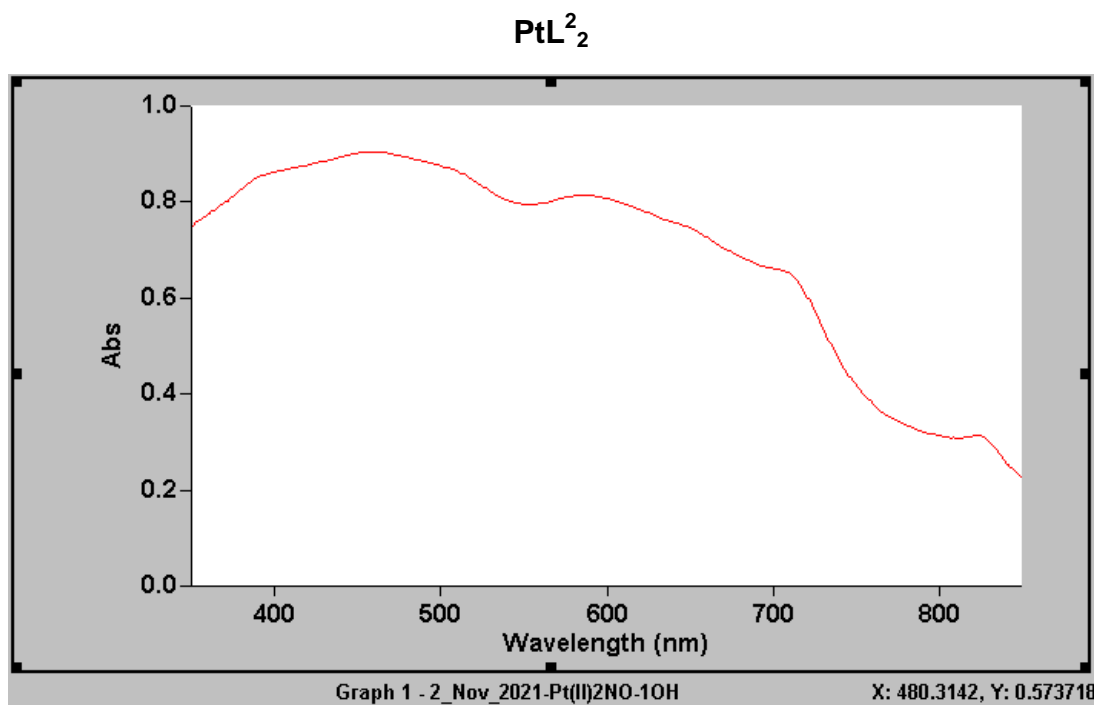

Two-dimensional fingerprint plot of complex  $\text{PtL}_2 \cdot \text{CH}_3\text{CN}$  showing the contribution of  $\pi-\pi$  stacking interaction to the total surface area.

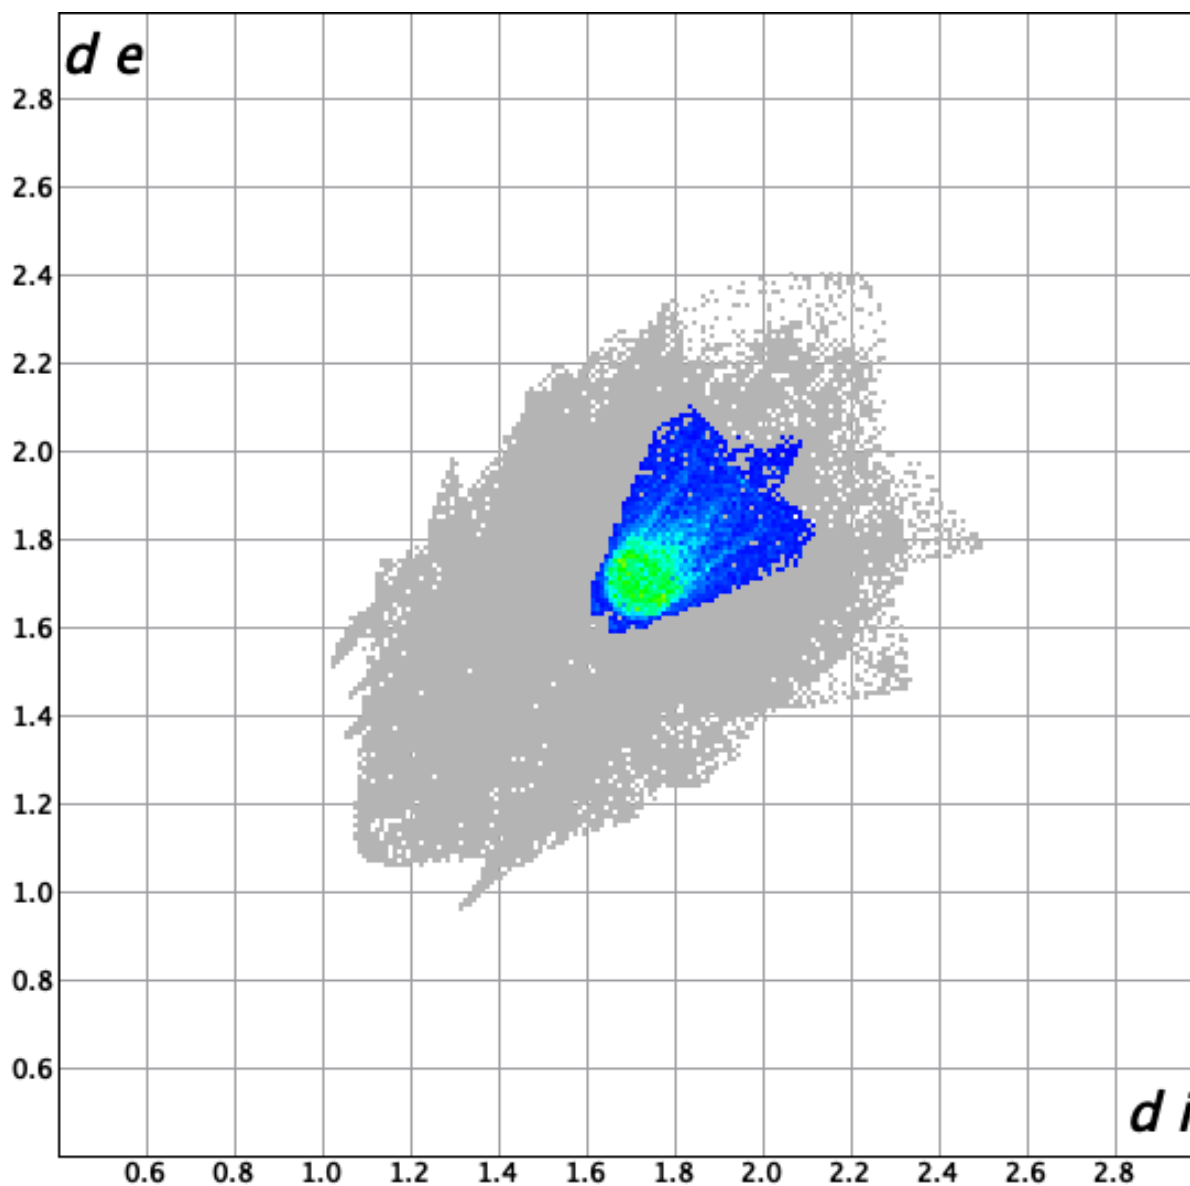

Two-dimensional fingerprint plot of complex  $\text{PtL}_2 \cdot \text{C}_6\text{H}_5\text{NO}_2$  showing the contribution of  $\pi$ - $\pi$  stacking interaction to the total surface area.

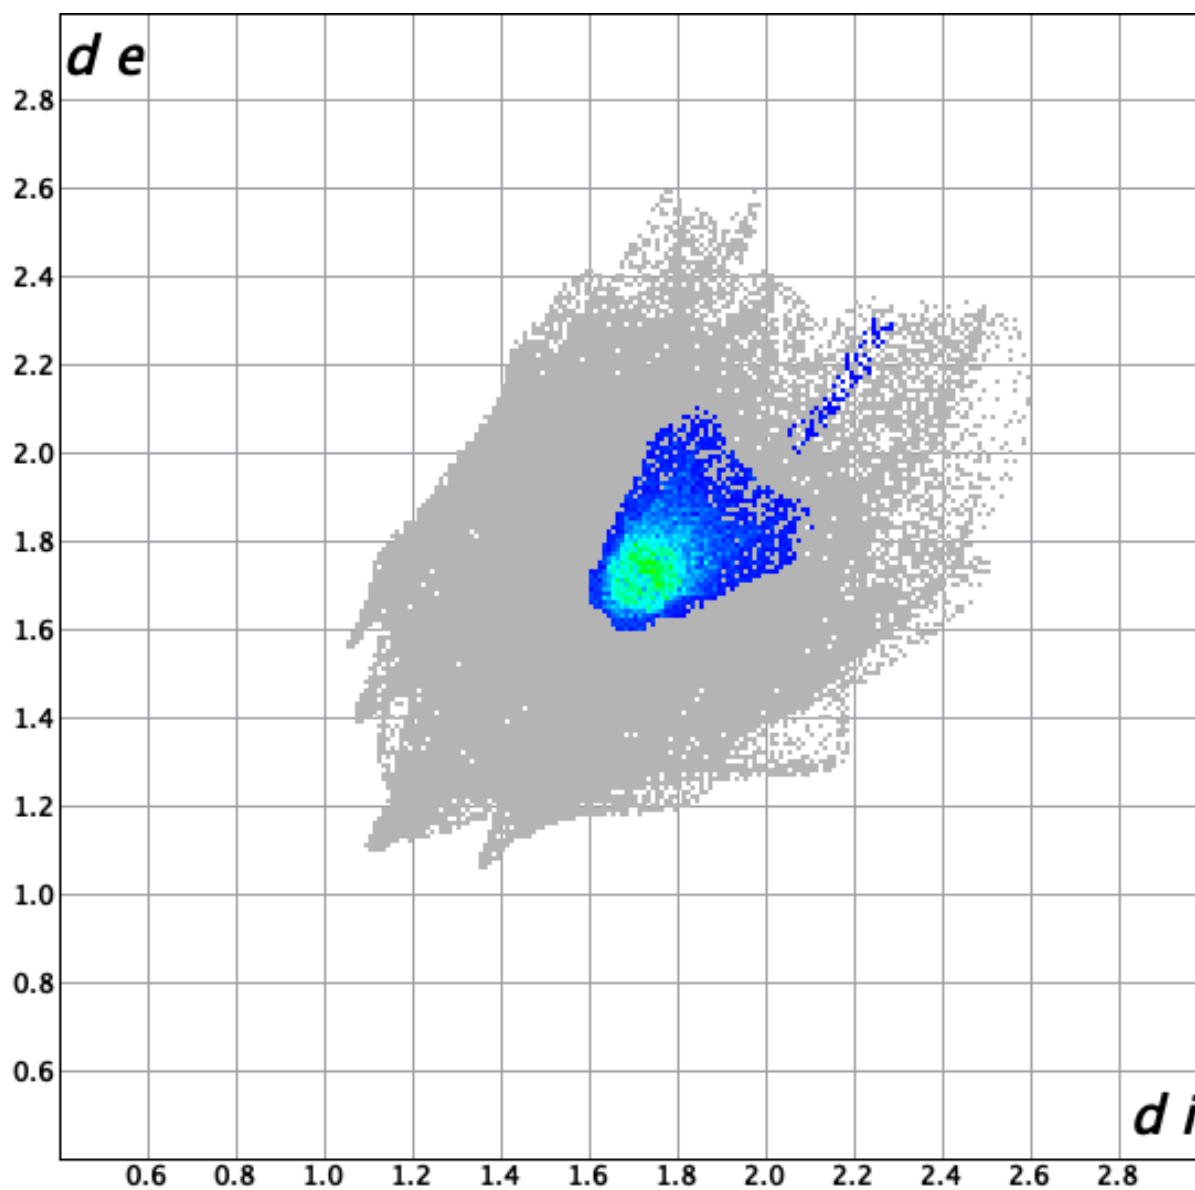

**CHECK CIF reports for crystal structures in this paper.**

## checkCIF/PLATON (basic structural check)

*Structure factors have been supplied for datablock(s) Pt-2NO-1OH\_acetonitrile*

No syntax errors found. [CIF dictionary](#)  
 Please wait while processing .... [Interpreting this report](#)  
[Structure factor report](#)

## Datablock: Pt-2NO-1OH\_acetonitrile

```

Bond precision: C-C = 0.0203 A          Wavelength=0.71073
Cell:          a=6.679(8)      b=10.897(13)    c=13.866(17)
               alpha=97.279(14) beta=93.082(16) gamma=92.877(14)
Temperature: 120 K

          Calculated              Reported
Volume      998(2)                998(2)
Space group  P -1                 P -1
Hall group   -P 1                 -P 1
Moiety formula C20 H12 N2 O4 Pt, C2 H3 N   C20 H12 N2 O4 Pt, C2 H3 N
Sum formula   C22 H15 N3 O4 Pt             C22 H15 N3 O4 Pt
Mr            580.45                     580.46
Dx,g cm-3     1.932                     1.932
Z             2                         2
Mu (mm-1)     7.064                     7.065
F000          556.0                     556.0
F000'         552.96
h,k,lmax      7,12,16                   7,13,17
Nref          3505                       3232
Tmin,Tmax     0.495,0.815                0.460,0.745
Tmin'         0.284

Correction method= # Reported T Limits:
Tmin=0.460 Tmax=0.745 AbsCorr = MULTI-SCAN
Data completeness= 0.922 Theta(max)= 24.999

R(reflections)= 0.0586( 1881)          wR2(reflections)=
                                0.1250( 3232)

S = 0.752          Npar= 272
  
```



The following ALERTS were generated. Each ALERT has the format

**test-name\_ALERT\_alert-type\_alert-level.**

Click on the hyperlinks for more details of the test.

---

### ●Alert level B

PLAT342\_ALERT\_3\_B Low Bond Precision on C-C Bonds ..... 0.0203 Ang.  
PLAT911\_ALERT\_3\_B Missing FCF Refl Between Thmin & STh/L= 0.595 272 Report  
PLAT973\_ALERT\_2\_B Check Calcd Positive Resid. Density on Pt1 1.70 eA-3

---

### ●Alert level C

GOODF01\_ALERT\_2\_C The least squares goodness of fit parameter lies  
outside the range 0.80 <> 2.00

Goodness of fit given = 0.752

PLAT018\_ALERT\_1\_C \_diffn\_measured\_fraction\_theta\_max .NE. \*\_full ! Check

PLAT148\_ALERT\_3\_C s.u. on the a - Axis is (Too) Large .... 0.008 Ang.

#### And 2 other PLAT148 Alerts

More ...

PLAT213\_ALERT\_2\_C Atom C19 has ADP max/min Ratio ..... 3.2 prolat

PLAT234\_ALERT\_4\_C Large Hirshfeld Difference C7 --C8 . 0.17 Ang.

PLAT906\_ALERT\_3\_C Large K Value in the Analysis of Variance ..... 3.528 Check

PLAT971\_ALERT\_2\_C Check Calcd Resid. Dens. 1.09Ang From Pt1 2.33 eA-3

#### And 2 other PLAT971 Alerts

More ...

PLAT972\_ALERT\_2\_C Check Calcd Resid. Dens. 1.06Ang From Pt1 -1.56 eA-3

PLAT975\_ALERT\_2\_C Check Calcd Resid. Dens. 0.78Ang From O4 . 0.99 eA-3

PLAT977\_ALERT\_2\_C Check Negative Difference Density on H2S2 . -0.35 eA-3

---

### ●Alert level G

PLAT003\_ALERT\_2\_G Number of Uiso or Uij Restrained non-H Atoms ... 11 Report

PLAT186\_ALERT\_4\_G The CIF-Embedded .res File Contains ISOR Records 2 Report

PLAT333\_ALERT\_2\_G Large Aver C6-Ring C-C Dist C1 -C10 . 1.45 Ang.

PLAT333\_ALERT\_2\_G Large Aver C6-Ring C-C Dist C11 -C20 . 1.45 Ang.

PLAT720\_ALERT\_4\_G Number of Unusual/Non-Standard Labels ..... 3 Note

PLAT794\_ALERT\_5\_G Tentative Bond Valency for Pt1 (II) . 2.06 Info

PLAT860\_ALERT\_3\_G Number of Least-Squares Restraints ..... 66 Note

PLAT883\_ALERT\_1\_G No Info/Value for \_atom\_sites\_solution\_primary . Please Do !

PLAT909\_ALERT\_3\_G Percentage of I>2sig(I) Data at Theta(Max) Still 30% Note

PLAT933\_ALERT\_2\_G Number of HKL-OMIT Records in Embedded .res File 13 Note

PLAT941\_ALERT\_3\_G Average HKL Measurement Multiplicity ..... 1.0 Low

PLAT954\_ALERT\_1\_G Reported (CIF) and Actual (FCF) Kmax Differ by . 1 Units

PLAT955\_ALERT\_1\_G Reported (CIF) and Actual (FCF) Lmax Differ by . 1 Units

PLAT961\_ALERT\_5\_G Dataset Contains no Negative Intensities ..... Please Check

PLAT963\_ALERT\_2\_G Both SHELXL WEIGHT Parameter Values Zero ..... Please Check

PLAT967\_ALERT\_5\_G Note: Two-Theta Cutoff Value in Embedded .res .. 50.0 Degree

PLAT978\_ALERT\_2\_G Number C-C Bonds with Positive Residual Density. 1 Info

---

0 **ALERT level A** = Most likely a serious problem - resolve or explain

3 **ALERT level B** = A potentially serious problem, consider carefully

14 **ALERT level C** = Check. Ensure it is not caused by an omission or oversight

17 **ALERT level G** = General information/check it is not something unexpected

4 ALERT type 1 CIF construction/syntax error, inconsistent or missing data

15 ALERT type 2 Indicator that the structure model may be wrong or deficient  
9 ALERT type 3 Indicator that the structure quality may be low  
3 ALERT type 4 Improvement, methodology, query or suggestion  
3 ALERT type 5 Informative message, check

PLATON version of 18/05/2022; check.def file version of 17/05/2022

## Datablock Pt-2NO-10H\_acetonitrile - ellipsoid plot

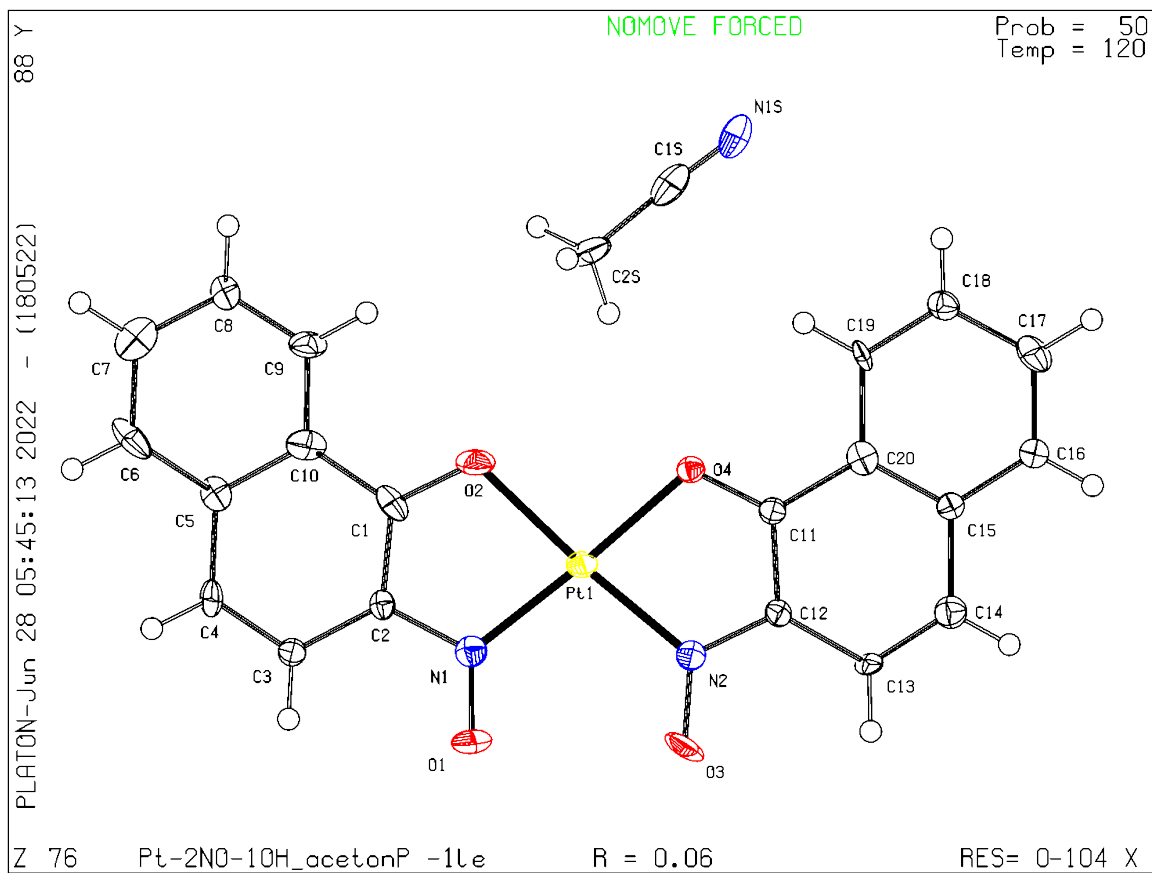

[Download CIF editor \(pubCIF\) from the IUCr](#)  
[Download CIF editor \(enCIFer\) from the CCDC](#)  
[Test a new CIF entry](#)



More ...

|                   |                                           |            |
|-------------------|-------------------------------------------|------------|
| PLAT972_ALERT_2_A | Check Calcd Resid. Dens. 0.90Ang From Pt1 | -3.99 eA-3 |
| PLAT972_ALERT_2_A | Check Calcd Resid. Dens. 0.86Ang From Pt1 | -3.63 eA-3 |

---

### ●Alert level B

|                   |                                           |            |
|-------------------|-------------------------------------------|------------|
| PLAT971_ALERT_2_B | Check Calcd Resid. Dens. 1.10Ang From N1  | 2.89 eA-3  |
| PLAT971_ALERT_2_B | Check Calcd Resid. Dens. 1.20Ang From O4  | 2.77 eA-3  |
| PLAT972_ALERT_2_B | Check Calcd Resid. Dens. 0.90Ang From Pt1 | -2.99 eA-3 |

#### And 2 other PLAT972 Alerts

More ...

---

### ●Alert level C

|                   |                                                  |                             |              |
|-------------------|--------------------------------------------------|-----------------------------|--------------|
| PLAT213_ALERT_2_C | Atom C5                                          | has ADP max/min Ratio ..... | 3.2 oblate   |
| PLAT222_ALERT_3_C | NonSolvent Resd 1 H                              | Uiso(max)/Uiso(min) Range   | 5.0 Ratio    |
| PLAT245_ALERT_2_C | U(iso) H16                                       | Smaller than U(eq) C16 by   | 0.016 Ang**2 |
| PLAT250_ALERT_2_C | Large U3/U1 Ratio for Average U(i,j) Tensor .... |                             | 2.1 Note     |
| PLAT342_ALERT_3_C | Low Bond Precision on C-C Bonds .....            |                             | 0.01496 Ang. |
| PLAT911_ALERT_3_C | Missing FCF Refl Between Thmin & STh/L=          | 0.600                       | 2 Report     |
| PLAT971_ALERT_2_C | Check Calcd Resid. Dens. 0.36Ang From O4         |                             | 2.49 eA-3    |

#### And 5 other PLAT971 Alerts

More ...

|                   |                                           |            |
|-------------------|-------------------------------------------|------------|
| PLAT972_ALERT_2_C | Check Calcd Resid. Dens. 0.94Ang From Pt1 | -1.95 eA-3 |
| PLAT972_ALERT_2_C | Check Calcd Resid. Dens. 1.10Ang From O4  | -1.83 eA-3 |
| PLAT976_ALERT_2_C | Check Calcd Resid. Dens. 0.99Ang From N1  | -1.19 eA-3 |

---

### ●Alert level G

|                   |                                                  |               |
|-------------------|--------------------------------------------------|---------------|
| PLAT012_ALERT_1_G | No _shelx_res_checksum Found in CIF .....        | Please Check  |
| PLAT068_ALERT_1_G | Reported F000 Differs from Calcd (or Missing)... | Please Check  |
| PLAT154_ALERT_1_G | The s.u.'s on the Cell Angles are Equal ..(Note) | 0.005 Degree  |
| PLAT164_ALERT_4_G | Nr. of Refined C-H H-Atoms in Heavy-Atom Struct. | 4 Note        |
| PLAT171_ALERT_4_G | The CIF-Embedded .res File Contains EADP Records | 5 Report      |
| PLAT769_ALERT_4_G | CIF Embedded explicitly supplied scattering data | Please Note   |
| PLAT794_ALERT_5_G | Tentative Bond Valency for Pt1 (II)              | 2.42 Info     |
| PLAT883_ALERT_1_G | No Info/Value for _atom_sites_solution_primary   | Please Do !   |
| PLAT910_ALERT_3_G | Missing # of FCF Reflection(s) Below Theta(Min). | 1 Note        |
| PLAT912_ALERT_4_G | Missing # of FCF Reflections Above STh/L= 0.600  | 54 Note       |
| PLAT933_ALERT_2_G | Number of HKL-OMIT Records in Embedded .res File | 7 Note        |
| PLAT941_ALERT_3_G | Average HKL Measurement Multiplicity .....       | 2.9 Low       |
| PLAT965_ALERT_2_G | The SHELXL WEIGHT Optimisation has not Converged | Please Check  |
| PLAT978_ALERT_2_G | Number C-C Bonds with Positive Residual Density. | 1 Info        |
| PLAT982_ALERT_1_G | The Pt-f' = -1.6379 Deviates from IT-value =     | -1.7033 Check |
| PLAT983_ALERT_1_G | The Pt-f'' = 8.5789 Deviates from IT-Value =     | 8.3905 Check  |

---

7 **ALERT level A** = Most likely a serious problem - resolve or explain

5 **ALERT level B** = A potentially serious problem, consider carefully

15 **ALERT level C** = Check. Ensure it is not caused by an omission or oversight

16 **ALERT level G** = General information/check it is not something unexpected

6 ALERT type 1 CIF construction/syntax error, inconsistent or missing data

27 ALERT type 2 Indicator that the structure model may be wrong or deficient

5 ALERT type 3 Indicator that the structure quality may be low

4 ALERT type 4 Improvement, methodology, query or suggestion

1 ALERT type 5 Informative message, check

PLATON version of 28/11/2022; check.def file version of 28/11/2022

## Datablock R1-Pt-2NO1OH\_nitrobenzene - ellipsoid plot

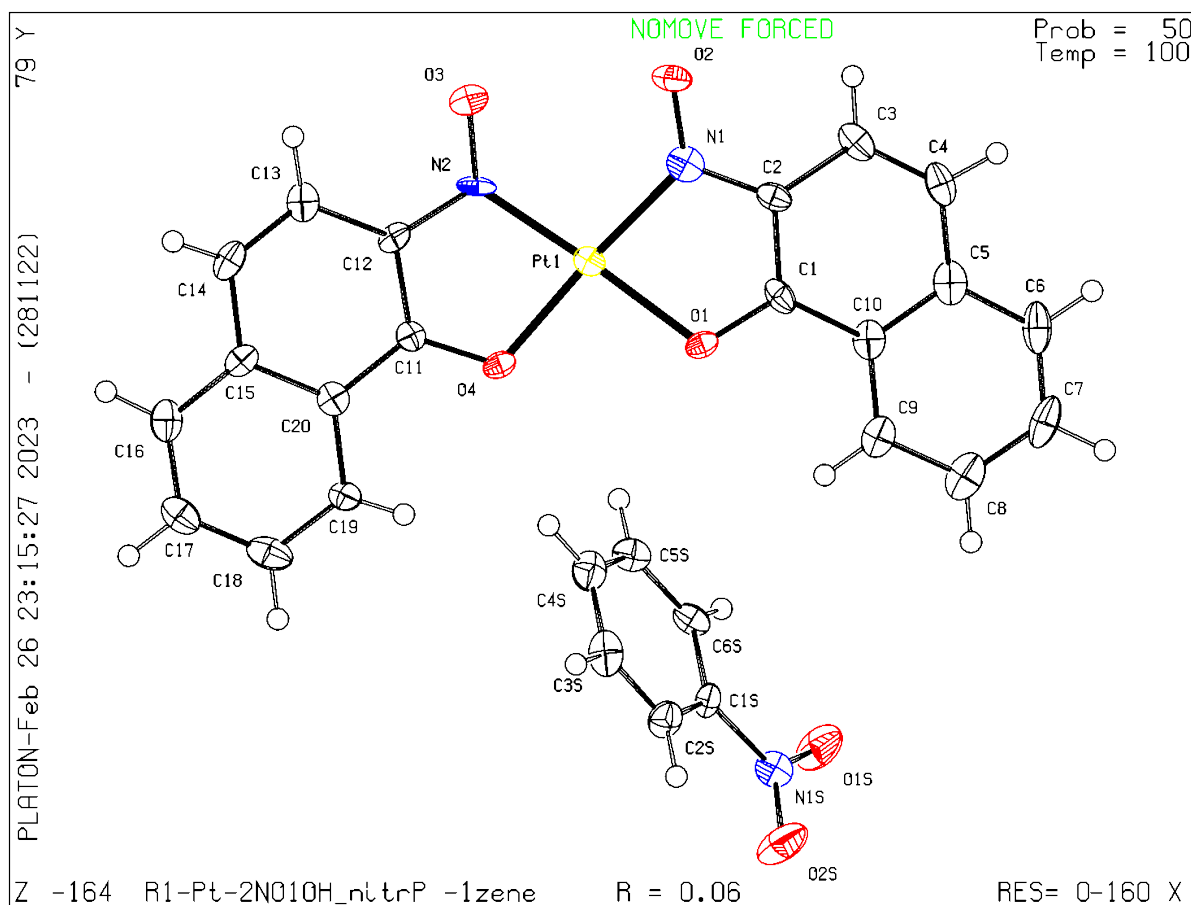

[Download CIF editor \(pubCIF\) from the IUCr](#)  
[Download CIF editor \(enCIFer\) from the CCDC](#)  
[Test a new CIF entry](#)
